# Supplementary material for: Coupling AAV-mediated promoterless gene targeting to SaCas9 nuclease to efficiently correct liver metabolic diseases
Source: JCI journal article supplement (doi:10.1172/jci.insight.128863), 2019-06-18
Supplement: sd1 [file 1]

# Coupling AAV-mediated promoterless gene targeting to SaCas9 nuclease to efficiently correct liver metabolic diseases

Alessia De Caneva<sup>1</sup>, Fabiola Porro<sup>1</sup>, Giulia Bortolussi<sup>1</sup>, Riccardo Sola<sup>1</sup>, Michela Lisjak<sup>1</sup>, Adi Barzel<sup>2</sup>, Mauro Giacca<sup>1</sup>, Mark A. Kay<sup>3</sup>, Kristian Vlahovicek<sup>4</sup>, Lorena Zentilin<sup>1</sup> and Andrés F. Muro<sup>1\*</sup>

## Supplementary Materials

### Supplementary Figures

Figure S1. Design of sgRNAs and in vitro testing with a reporter vector.

Figure S2. *sgRNA8* is more efficient than *sgRNA7* to induce INDELs at the endogenous albumin locus in NIH-3T3 cells.

Figure S3. *sgRNA8* efficiently induce INDELs at the albumin locus in neonatal treated mice.

Figure S4. Determination of the most effective dose of rAAV8-*SaCas9*-sgRNA8.

Figure S5. The intravenous route of administration is more efficient than the intraperitoneal one.

Figure S6. Spontaneous HR is more efficient at P2 administration than at P4 one.

Figure S7. WB analysis of liver extracts from Crigler-Najjar mice treated with rAAV8-donor-*hUGT1A1* and rAAV8-*SaCas9*-sgRNA8

Figure S8. *Ugt1*<sup>-/-</sup> rAAV8-treated mice show normal brain histology.

Figure S9. *Ugt1*<sup>-/-</sup> rAAV8-treated mice show normal liver histology.

Figure S10. *Ugt1*<sup>-/-</sup> rAAV8-treated mice show no evidence of inflammation.

Figure S11. Normal mRNA and protein levels of albumin after *SaCas9* administration.

Figure S12. *SaCas9* protein levels decrease to undetectable levels 30 days after its administration.

Figure S13. Full uncut gels of Figure S12.

Figure S14. Analysis of *SaCas9* off-target activity.

Figure S15. Full uncut gels of Figure 2B.

Figure S16. Full uncut gels of Figure 2D.

Figure S17. Full uncut gels of Figure 3C.

### Supplementary Tables

Table S1. Gap-length frequency analysis of the albumin on-target site (*sgRNA8*)

Table S2. Positional-frequency analysis of the albumin on-target site (*sgRNA8*)

Table S3. Positional-frequency analysis of predicted off-target sites

Table S4. Gap-length frequency analysis of predicted off-target sites

Table S5. Description of animal treatments

Table S6. List of oligonucleotides coding for the sgRNAs

Table S7. Primers used to amplify the albumin target region

Table S8. List of oligonucleotides used for qRT-PCR

Table S9. List of antibodies

Table S10. List of oligonucleotides used for NGS sequencing of on- and off-targets

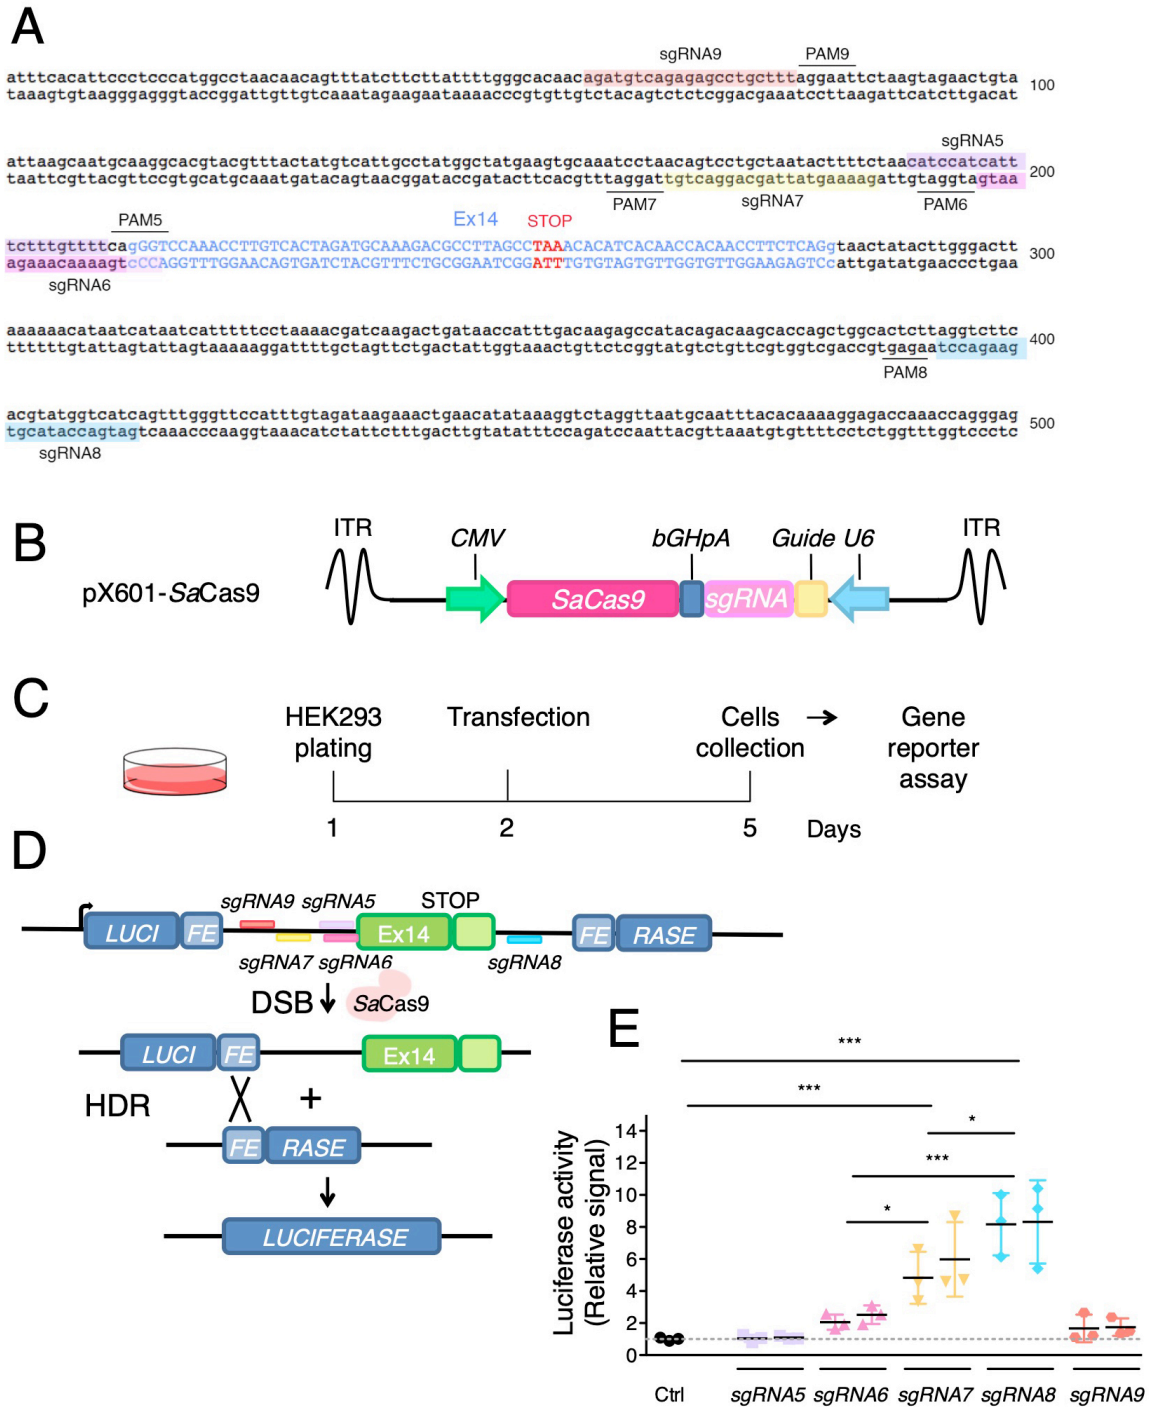

**Figure S1. Design of sgRNAs and in vitro testing with a reporter vector.** (A) The albumin exon 14 (capital letters), stop codon (STOP), flanking introns (small caps), and the identified sgRNAs are shown. (B) Scheme of the pX601-SaCas9 vector. ITR, inverted terminal repeat; CMV, Cytomegalovirus promoter; SaCas9, *Staphylococcus aureus* Cas9; bGHpA, bovine growth hormone polyadenylation signal; sgRNA, single guide RNA; Guide, incomplete sgRNA-coding sequence; U6, RNA polIII promoter. (C) Scheme of the experimental design. HEK293 cells were transiently transfected with the pX601-SaCas9 plasmid and the homologous recombination reporter vector, and luciferase activity was determined. (D) Scheme of the homologous recombination reporter vector and resulting recombination product. The recombination reporter vector (34) contained the albumin exon 14 and flanking introns. Recombination between the repeated luciferase sequences results in the reconstitution of luciferase activity. (E) The dot plot graph shows the luciferase activity determined after transfection of the pX601-SaCas9 vectors (low and a high amounts). Values are normalized respect to cells transfected with the reporter vector alone (Ctrl). Two-way ANOVA: interaction, ns,  $P = 0.9569$ ; sgRNA, \*\*\*,  $P < 0.0001$ ; dose, ns,  $P = 0.4743$ ; Bonferroni *post hoc* tests analysis; experiments were conducted in triplicate.

A

|               | Clones | Insertions | Deletions | % INDELs |
|---------------|--------|------------|-----------|----------|
| <i>sgRNA7</i> | 24     | 3          | 6         | 38%      |
| <i>sgRNA8</i> | 24     | 6          | 11        | 71%      |

B

mAlb ACTATGTCATTGCCTATGGCTATGAAGTGCAAATCCTAACAGTCCTGCTAATACTTTCTAACATCCATCATTTCCTT

c12 Δ43 ACTATGTCATTGCCTATG-----ACATCCATCATTTCCTT

c14 Δ45 ACTATGTCATTGCCTA-----ACATCCATCATTTCCTT

c115 Δ2 ACTATGTCATTGCCTATGGCTATGAAGTGCAAATCCTAA--GTCCTGCTAATACTTTCTAACATCCATCATTTCCTT

c125 Δ9 ACTATGTCATTGCCTATGGCTATGAAGTGCAAATCCT-----GCTAATACTTTCTAACATCCATCATTTCCTT

c126 Δ2 ACTATGTCATTGCCTATGGCTATGAAGTGCAAATCCTAA--GTCCTGCTAATACTTTCTAACATCCATCATTTCCTT

c127 Δ2 ACTATGTCATTGCCTATGGCTATGAAGTGCAAATCCTAA--GTCCTGCTAATACTTTCTAACATCCATCATTTCCTT

mAlb ACTATGTCATTGCCTATGGCTATGAAGTGCAAATCCTAACAG-----TCCTGCTAATACTTTCTAACATCCATCATTTCCTT

c13 +201 ACTATGTCATTGCCTATGGCTATGAAGTGCAAATCCTATTTT-----TCCTGCTAATACTTTCTAACATCCATCATTTCCTT

c114 +2 ACTATGTCATTGCCTATGGCTATGAAGTGCAAATCCTAACAG-----TCCTGCTAATACTTTCTAACATCCATCATTTCCTT

c116 +1 ACTATGTCATTGCCTATGGCTATGAAGTGCAAATCCTAACAA-----TCCTGCTAATACTTTCTAACATCCATCATTTCCTT

C

mAlb TACAGACAAGCACCAGCTGGCACTCTTAGGTCCTCACGTATGGTCATCAGTTTGGGTTCCATTGTAGATAAGAAAC

c134 Δ18 TACAGACAAGCACCAGCTGGCACTCTT-----TCAGTTTGGGTTCCATTGTAGATAAGAAAC

c135 Δ437 TACAGACAAGCACCAGCTGGCACTCT-----TCACGTATGGTCATCAGTTTGGGTTCCATTGTAGATAAGAAAC

c140 Δ7 TACAGACAAGCACCAGCTGGCACTCT-----TCACGTATGGTCATCAGTTTGGGTTCCATTGTAGATAAGAAAC

c143 Δ21 TACAGACAAGCACCAGCTGGCACTCTAGG-----TGGTCATCAGTTTGGGTTCCATTGTAGATAAGAAAC

c144 Δ2 TACAGACAAGCACCAGCTGGCACTCTTAGG--TTCACGTATGGTCATCAGTTTGGGTTCCATTGTAGATAAGAAAC

c146 Δ14 TACAGACAAGCACCAGCTGG--CAGGTATGGTCATCAGTTTGGGTTCCATTGTAGATAAGAAAC

c148 Δ2 TACAGACAAGCACCAGCTGGCACTCTTA--TCCTTCACGTATGGTCATCAGTTTGGGTTCCATTGTAGATAAGAAAC

c155 Δ1 TACAGACAAGCACCAGCTGGCACTCTTAG--TCCTTCACGTATGGTCATCAGTTTGGGTTCCATTGTAGATAAGAAAC

c157 Δ2 TACAGACAAGCACCAGCTGGCACTCTTA--TCCTTCACGTATGGTCATCAGTTTGGGTTCCATTGTAGATAAGAAAC

c158 Δ2 TACAGACAAGCACCAGCTGGCACTCTTA--TCCTTCACGTATGGTCATCAGTTTGGGTTCCATTGTAGATAAGAAAC

c159 Δ14 TACAGACAAGCACCAG-----TCCTTCACGTATGGTCATCAGTTTGGGTTCCATTGTAGATAAGAAAC

mAlb TACAGACAAGCACCAGCTGGCACTCTTAGG-----TCCTTCACGTATGGTCATCAGTTTGGGTTCCATTGTAGATAA

c131 +44 TACAGACAAGCACCAGCTGGCACTCTTAGG-----TCCTTCACGTATGGTCATCAGTTTGGGTTCCATTGTAGATAA

c136 +166 TACAGACAAGCACCAGCTGGCACTCTTAGG-----TCCTTCACGTATGGTCATCAGTTTGGGTTCCATTGTAGATAA

c141 +500 TACAGACAAGCACCAGCTGGCACTCTTAGG-----TCCTTCACGTATGGTCATCAGTTTGGGTTCCATTGTAGATAA

c147 +209 TACAGACAAGCACCAGCTGGCACTCTTA--TCCTTCACGTATGGTCATCAGTTTGGGTTCCATTGTAGATAA

c151 +136 TACAGACAAGCACCAGCTGGCACTCTTAGG-----TCCTTCACGTATGGTCATCAGTTTGGGTTCCATTGTAGATAA

c156 +340 TACAGACAAGCACCAGCTGGCACTCT-----TCCTTCACGTATGGTCATCAGTTTGGGTTCCATTGTAGATAA

**Figure S2. *sgRNA8* is more efficient than *sgRNA7* to induce INDELs at the endogenous albumin locus in NIH-3T3 cells.** (A) The PCR products obtained in Figure 2B were cloned and 24 independent clones from each *sgRNA* treatment were sequenced. The number of clones presenting insertions and deletions, and the total % of INDELs are indicated. (B, C) Alignments of the sequences of the analyzed clones treated with *SaCas9*-*sgRNA7* (B), or *SaCas9*-*sgRNA8* (C). Sequences were aligned to that of the mouse albumin gene (mAlb). The *sgRNA7* sequence is highlighted in yellow while the *sgRNA8* one in light blue. The corresponding PAM regions are typed in blue, while base modifications are indicated in red. The length of deletions and insertions (in bp) are indicated as Δ and +, respectively, next to the clone number (cl).

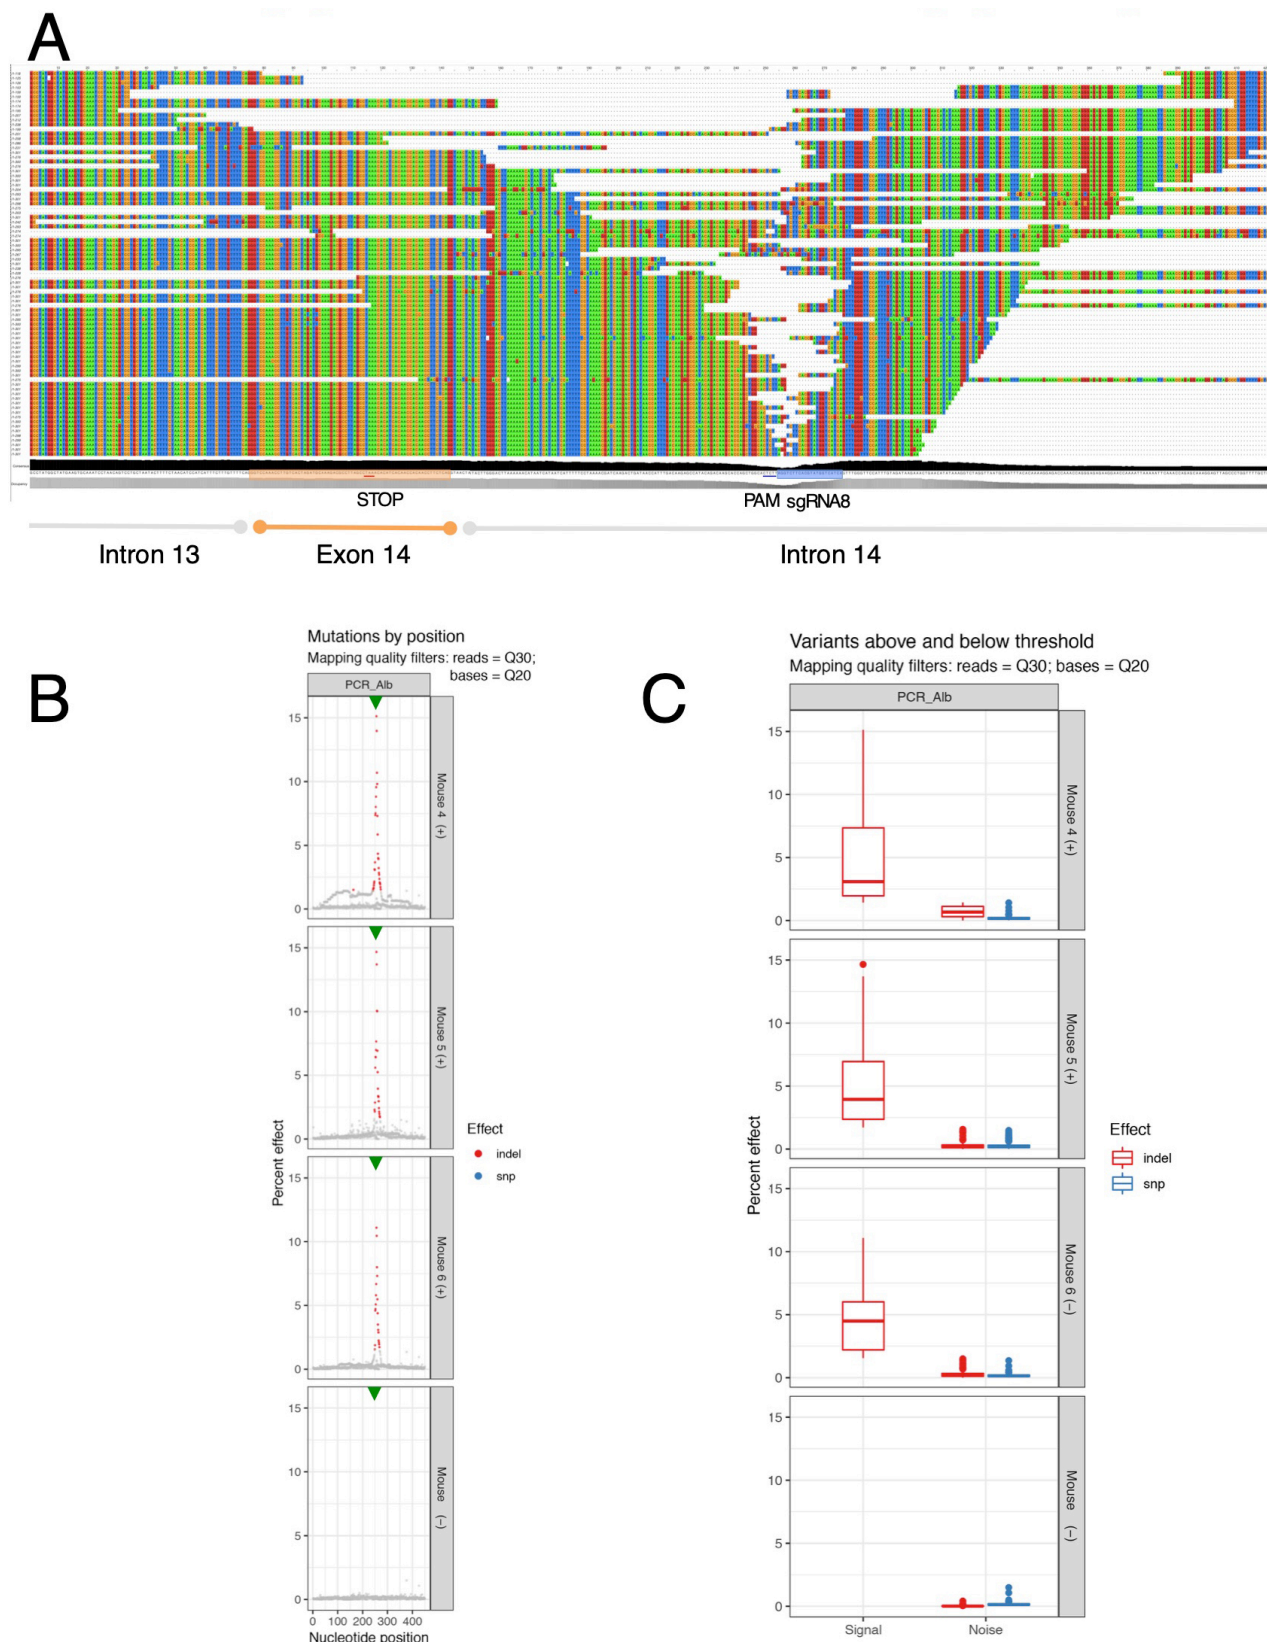

**Figure S3. sgRNA8 efficiently targets the albumin locus in neonatal treated mice.** (A) Representative nucleotide sequences of the targeted albumin locus of *sgRNA8* treated mice. Sequences shown represent gap length diversity rather than the actual frequency distribution. The length of the PCR fragment was 517 bp (B) Mutation frequency analysis at the albumin target site by *sgRNA8*. The dots represent the percentage of reads with bases different from the original sequence at each base position. The colored dots indicate variants above noise levels; the grey dots represent levels predicted as sequencing noise. The *SaCas9* on-target site is indicated by green arrowheads. The analysis was performed in the same animals analyzed in Figure 2C-D. (C) Box plots of the distributions of the data shown in Panel B, with indicated median values. Signal and noise distributions are plotted separately. Indels are represented in red and snp in blue.

|            |         |         |         |         |
|------------|---------|---------|---------|---------|
| Vg/mouse   | 2.5E+11 | 5.0E+11 | 7.5E+11 | 1.0E+12 |
| INDELs (%) | 6.2     | 4.5     | 25.2    | 27.9    |

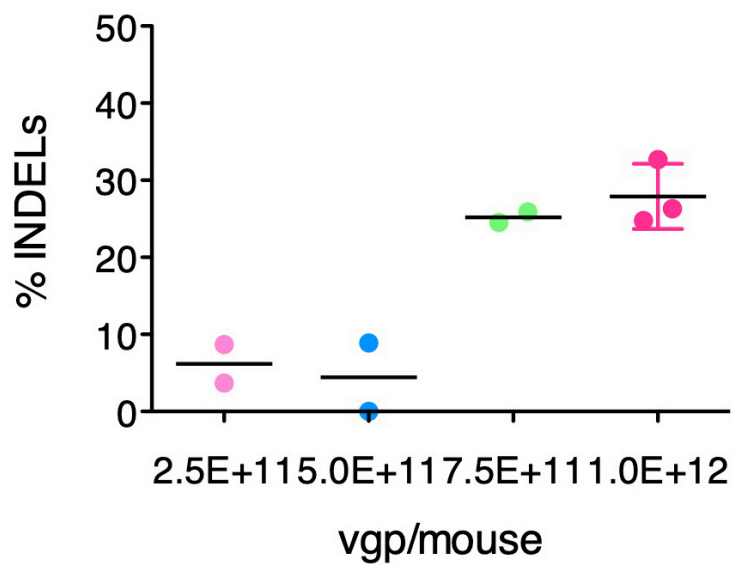

**Figure S4. Determination of the most effective dose of rAAV8-*SaCas9*-sgRNA8.** The % of INDELs obtained after transducing P4 WT pups by intraperitoneal injection are indicated. The doses used in each experimental group (n=2 mice/dose, except in the 1.0E12 group, n=3) are indicated.

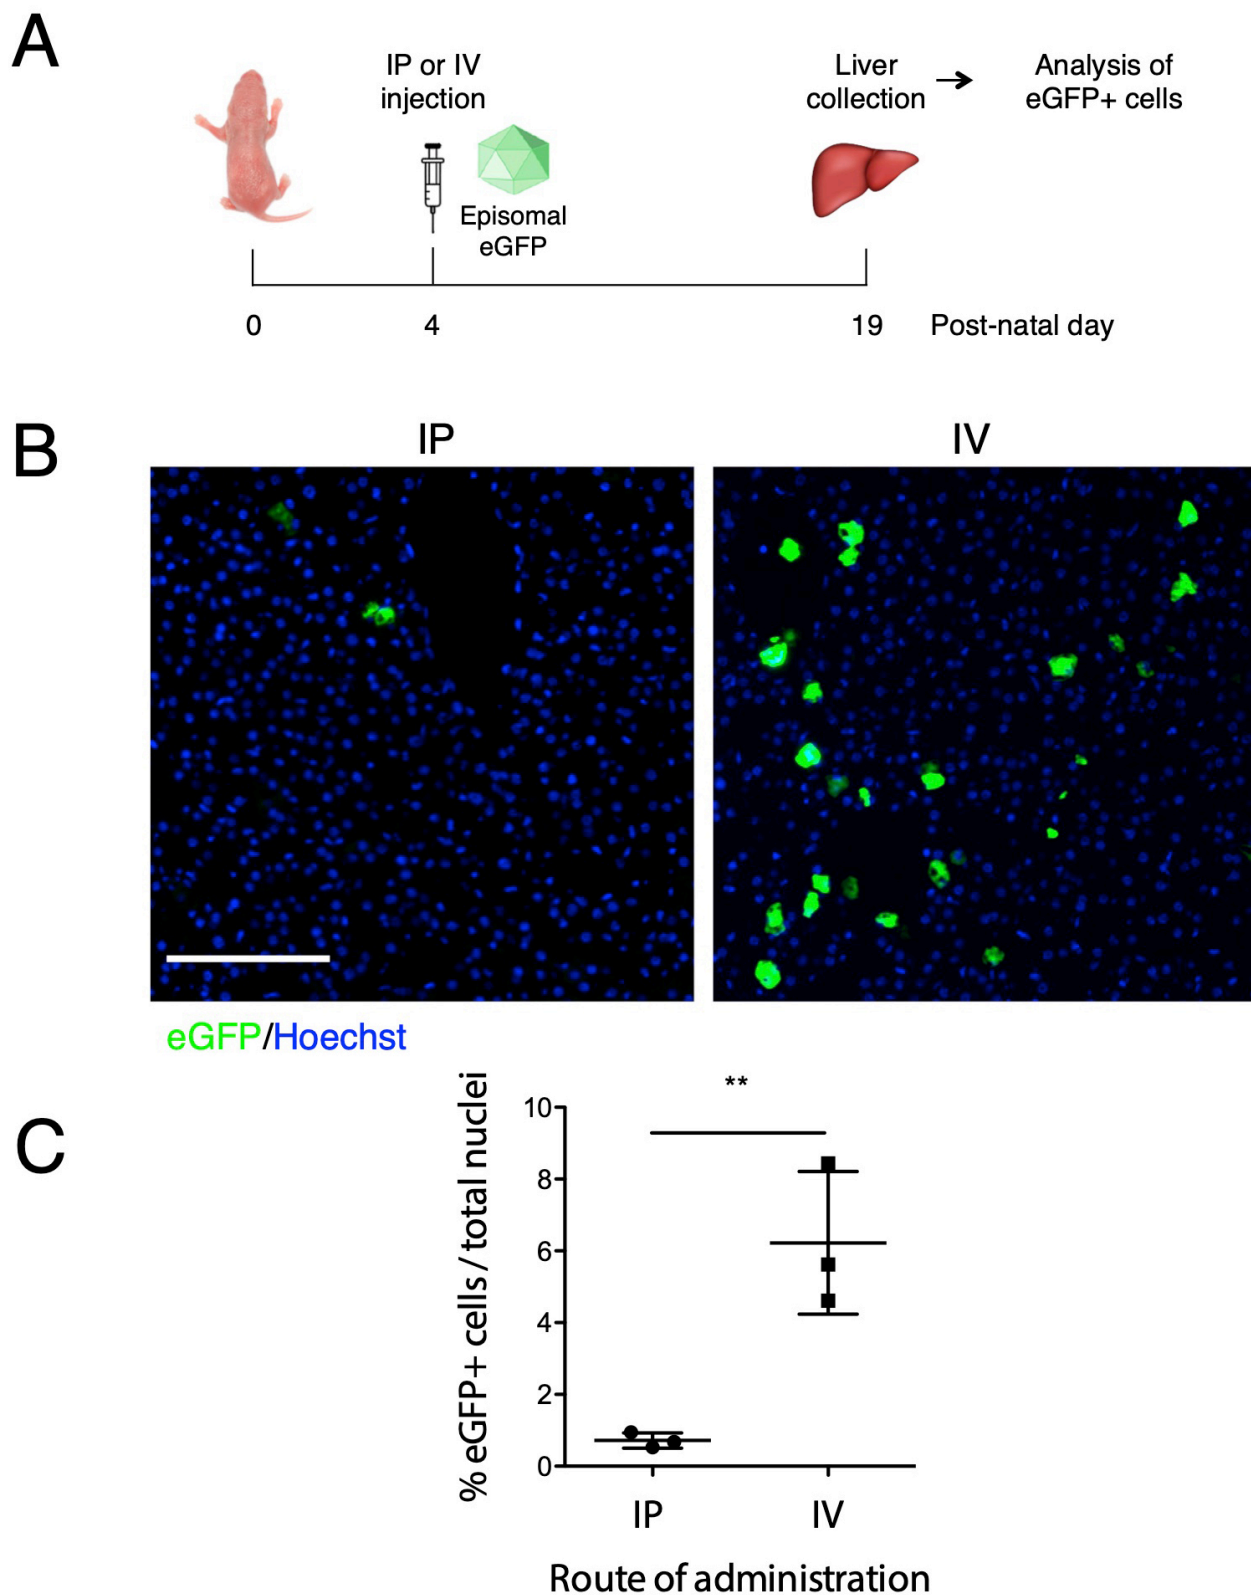

**Figure S5. The intravenous route of administration is more efficient than the intraperitoneal one.** (A) Scheme of the experimental strategy used to compare intraperitoneal (IP) and intravenous (IV) administration routes. WT newborn mice were IP or IV transduced at post-natal day 4 with the same dose ( $1.0 \times 10^{11}$  vg/mouse) of the rAAV8-pGG2-AAT-eGFP episomal vector (13). The liver was collected at post-natal day 19 and the number of eGFP positive cells in liver sections was evaluated. (B) Histological analysis of liver sections of IP- or IV-transduced mice. Nuclei were counterstained with Hoechst. Representative images are shown. Scale bar 500  $\mu$ m. (C) Quantification of the number of eGFP-positive hepatocytes. Unpaired Student's t-test, \*\*,  $P = 0.0088$ ,  $n = 3$  per experimental group, 10 images per animal were analyzed.

**A**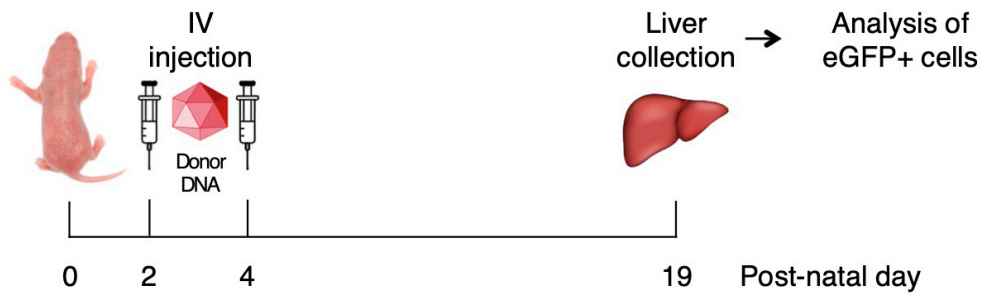**B**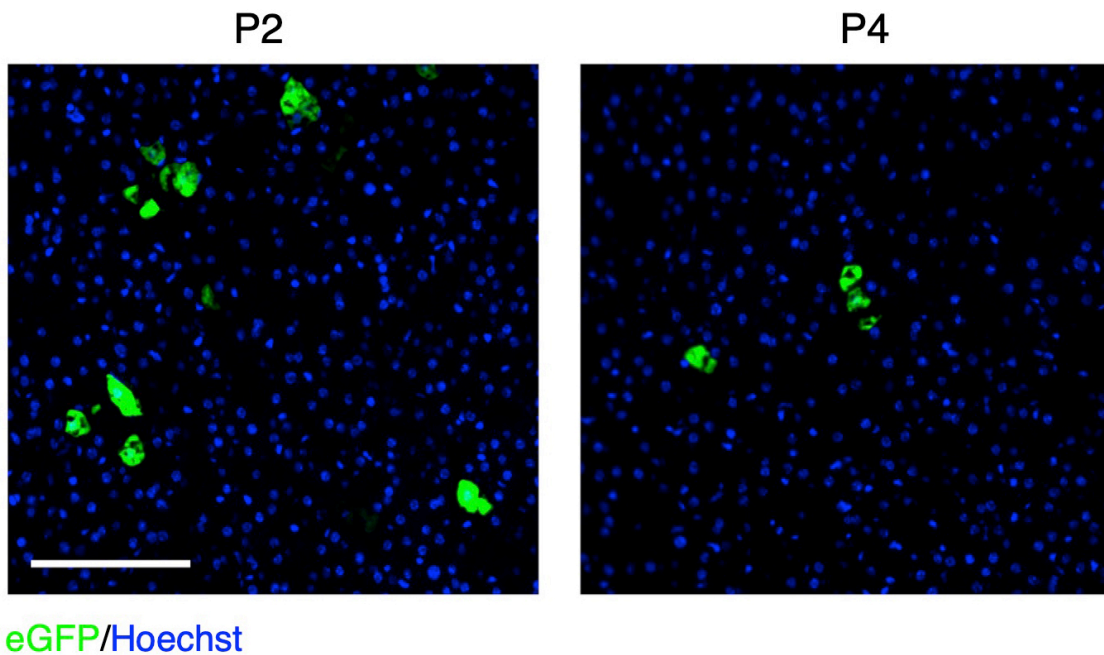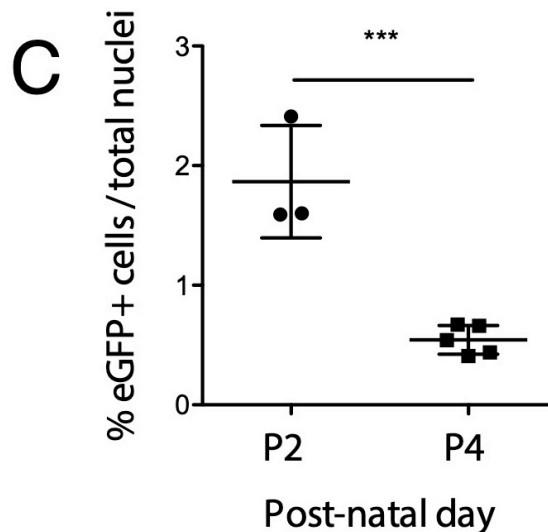

**Figure S6. Spontaneous HR is more efficient at P2 administration than at P4 one.** (A) Scheme of the experimental design. WT newborn mice were IV transduced with rAAV8-donor-*eGFP* at P2 or P4 with  $8.0 \times 10^{11}$  vg/mouse of rAAV8-donor-*eGFP*. Liver was collected at P19 and the number of eGFP-positive cells was determined. (B) Histological analysis of liver sections. Nuclei were counterstained with Hoechst. Scale bar 500  $\mu$ m. (C) Quantification of the number of eGFP positive hepatocytes. Unpaired Student's t-test, \*\*\*,  $P = 0.0008$ .  $n=3$  and 5 for the animals transduced at P2 and P4, respectively; 10 images per animal were analyzed.

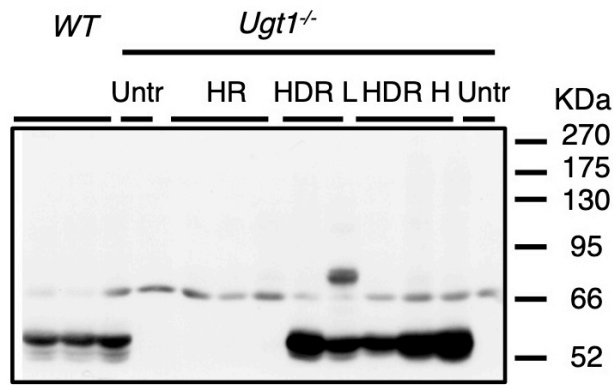

Ugt1-Long exposition

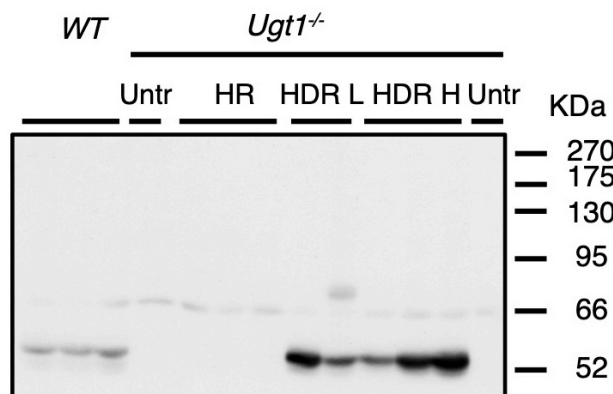

Ugt1-Short exposition

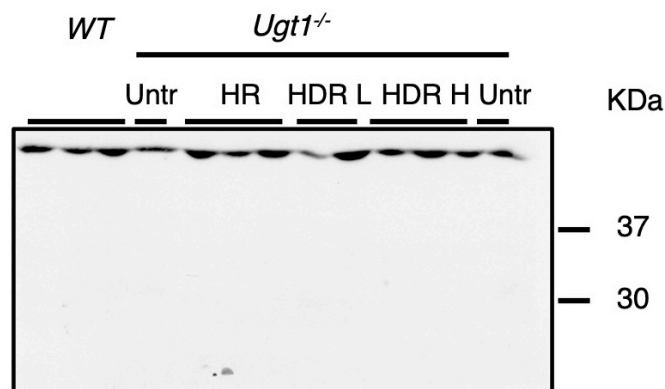

Actin

**Figure S7. WB analysis of liver extracts from Crigler-Najjar mice treated with rAAV8-donor-*hUGT1A1* and rAAV8-*SaCas9*-sgRNA8.** *Ugt1*<sup>-/-</sup> newborn mice were IV transduced at P2 with rAAV8-donor-*hUGT1A1* alone (HR; 2.0E11 vg/mouse) or in combination with rAAV8-*SaCas9*-sgRNA8, using two different *SaCas9* doses (low, HDR L; or high, HDR H; 6.0E10 and 2.0E11 vg/mouse, respectively), as described in Figure 4. The complete gels of the Western blot analyses of liver protein extracts using an anti-Ugt1 antibody with human and mouse specificity are shown (Short and long expositions). No bands corresponding to the potential full length Albumin-P2A-*hUGT1A1* protein were detected, suggesting efficient ribosomal skipping by the P2A.

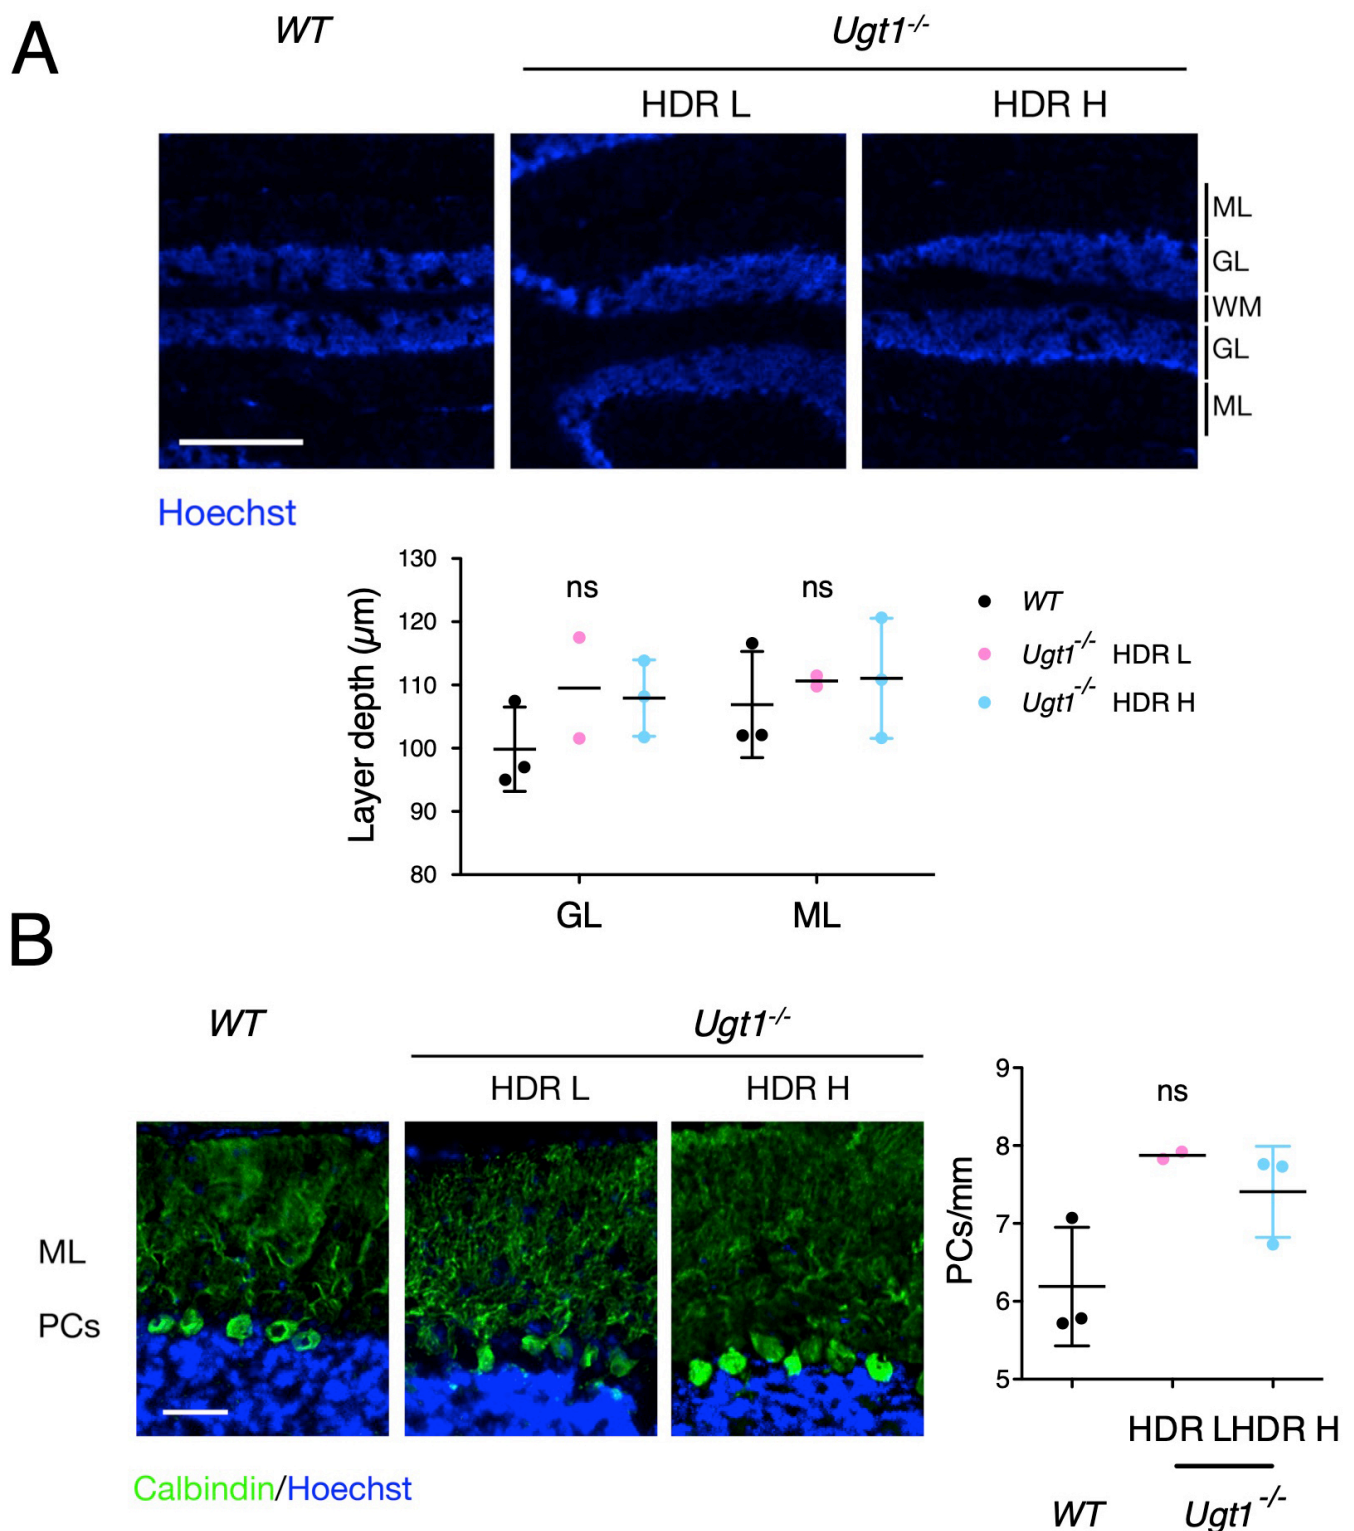

**Figure S8 *Ugt1*<sup>-/-</sup> rAAV8-treated mice show normal brain histology.** (A) Cerebellar layer thickness was determined in WT untreated and *Ugt1*<sup>-/-</sup> rAAV8-treated mice (M10) with a constant dose of the donor vector and two different *SaCas9* doses (low, HDR L; or high, HDR H), using Hoechst-stained brain sections. Representative images are shown. ML, molecular layer; GL, granular layer; WM, white matter. Scale bar = 480 μm. *WT* vs. HDR H, unpaired t-test, GL: ns, *P* = 0.1945; ML: ns, *P* = 0.6024. *WT* and HDR H, *n* = 3; HDR L, *n* = 2. (B) Left panel, Purkinje cells immunofluorescence analysis of cerebellar sections using an anti-Calbindin specific antibody. Nuclei were counterstained with Hoechst. Scale bar 50 μm. *WT* and HDR H, *n* = 3; HDR L, *n* = 2. ML, molecular layer; PCs, Purkinje cells. Right panel, quantification of PCs density. Student t-test, ns, *P* = 0.0936. The analysis was performed in the same animals used in Figure 4.

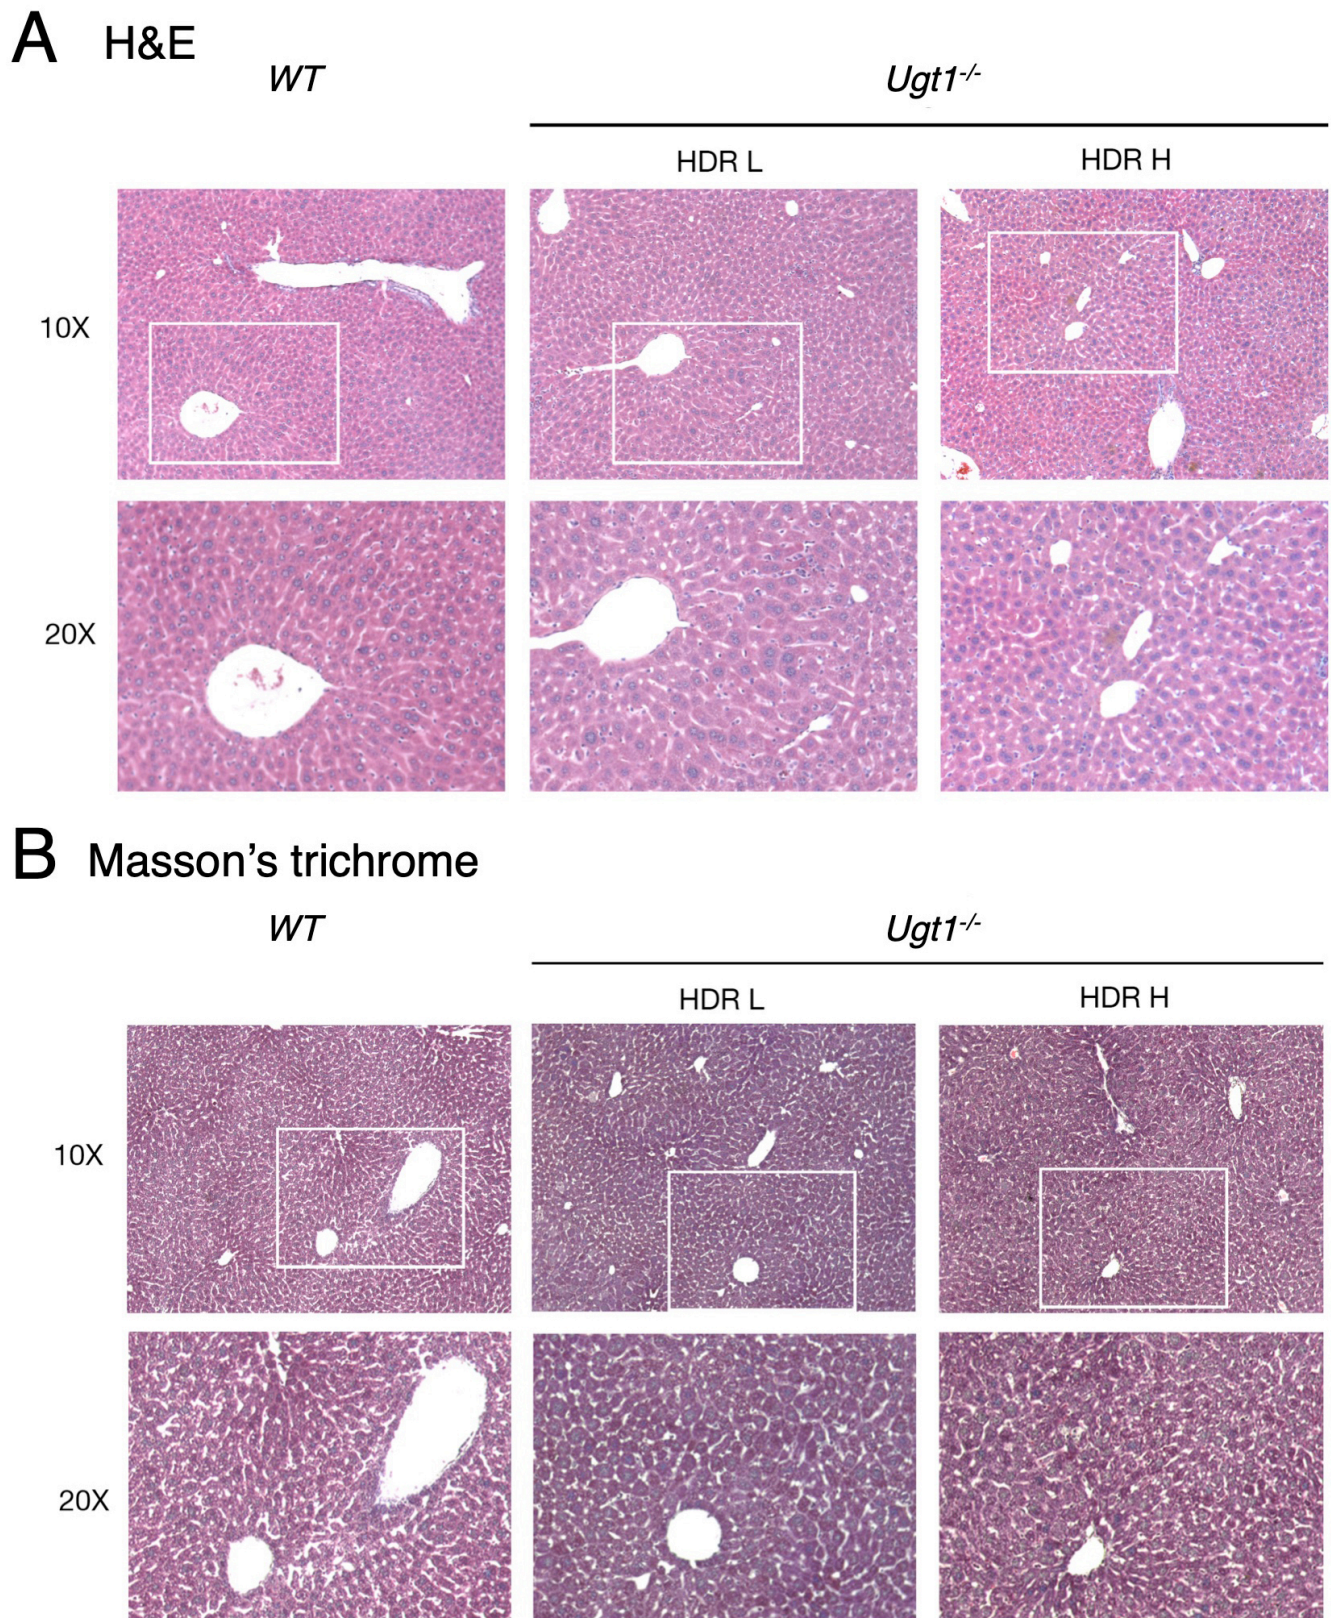

**Figure S9 *Ugt1*<sup>-/-</sup> rAAV8-treated mice show normal liver histology.** (A) (B) Haematoxylin-Eosin (H&E) (A) and Masson's trichrome (B) stainings of liver sections from WT/HET untreated and *Ugt1*<sup>-/-</sup> rAAV8-treated mice (M10) with a constant dose of the donor vector and two different *SaCas9* doses (low, HDR L; or high, HDR H). 10 x and 20 x magnifications are shown. WT and HDR H, n = 3; HDR L, n = 2. The analysis was performed in the same animals used in Figure 4.

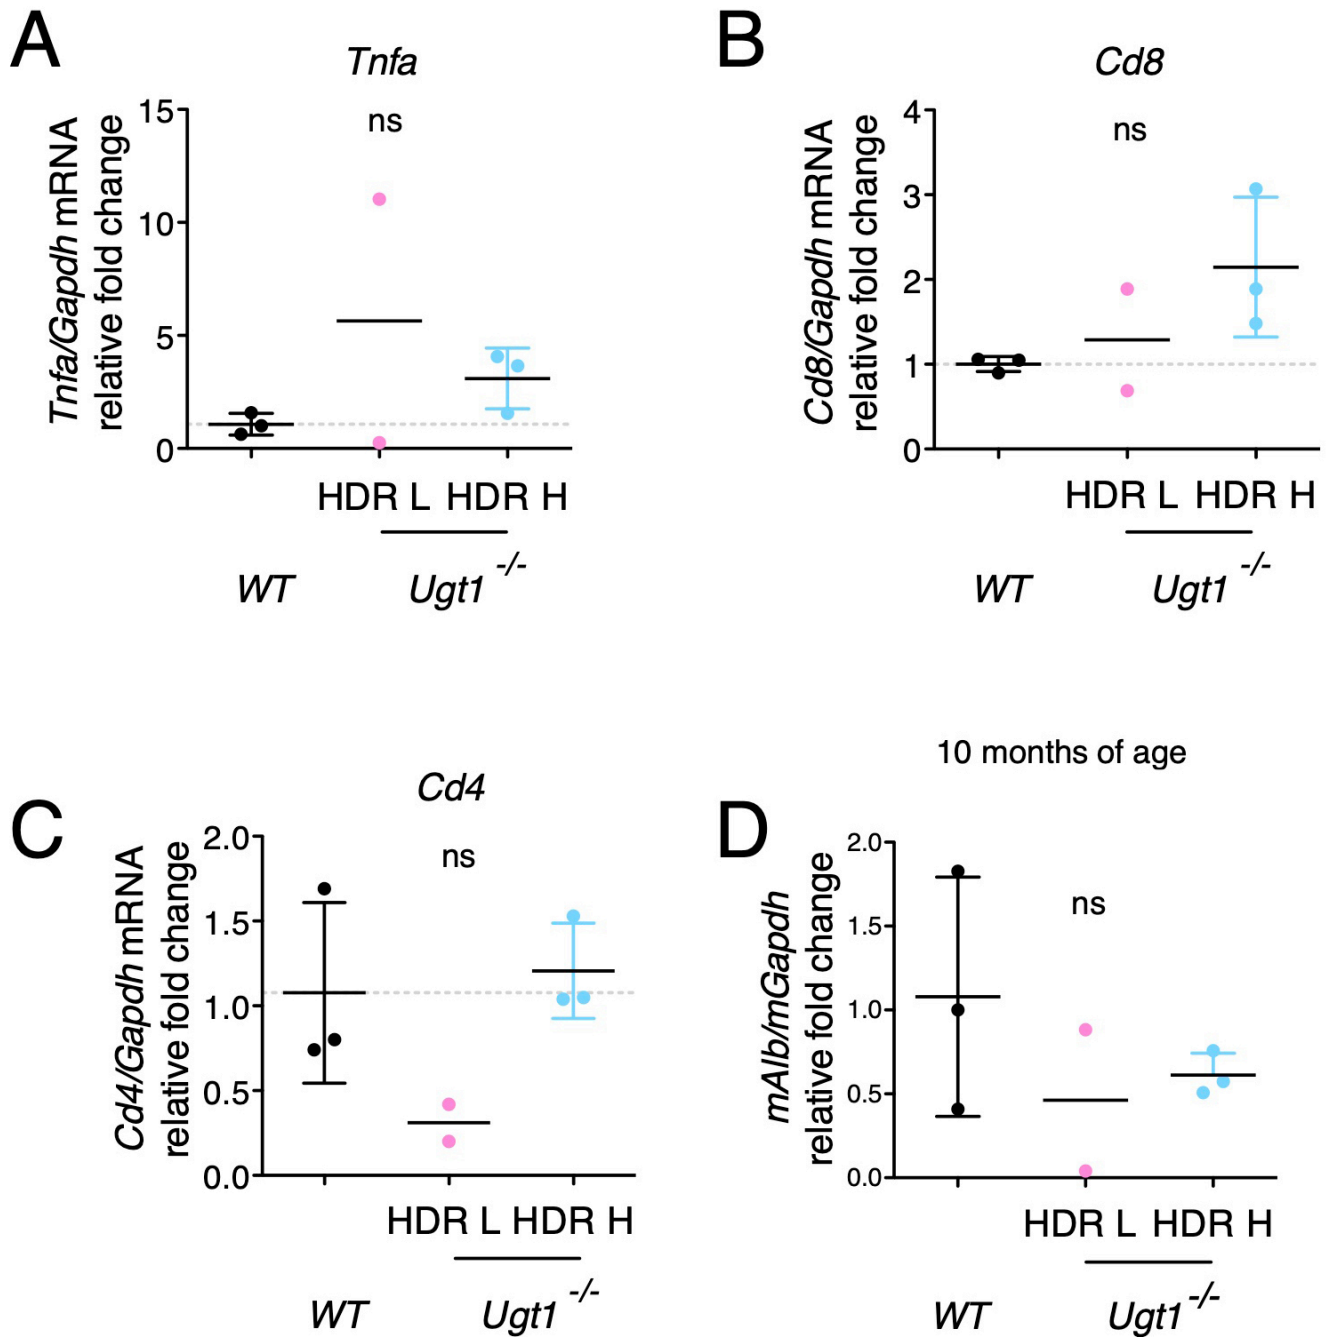

**Figure S10** *Ugt1*<sup>-/-</sup> rAAV8-treated mice show no evidence of inflammation. (A-D) Evaluation of the mRNA levels by qRT-PCR of *Tnfa* (A), *Cd8* (B), *Cd4* (C) and *Infg* (D) of WT untreated and *Ugt1*<sup>-/-</sup> rAAV8-treated mice with two different donor-SaCas9 ratios (low, HDR L; or high, HDR H), at 10 months of age. *Gapdh* was used to normalize all inflammatory markers levels. Student t-test: *Tnfa*, ns,  $P = 0.0702$ ; *Cd8*, ns,  $P = 0.0756$ ; *Cd4*, ns,  $P = 0.7270$ ; *Infg*, ns,  $P = 0.8456$ . HDR L,  $n = 2$ ; WT and HDR H,  $n = 3$ . The analysis was performed in the same animals used in Figure 4.

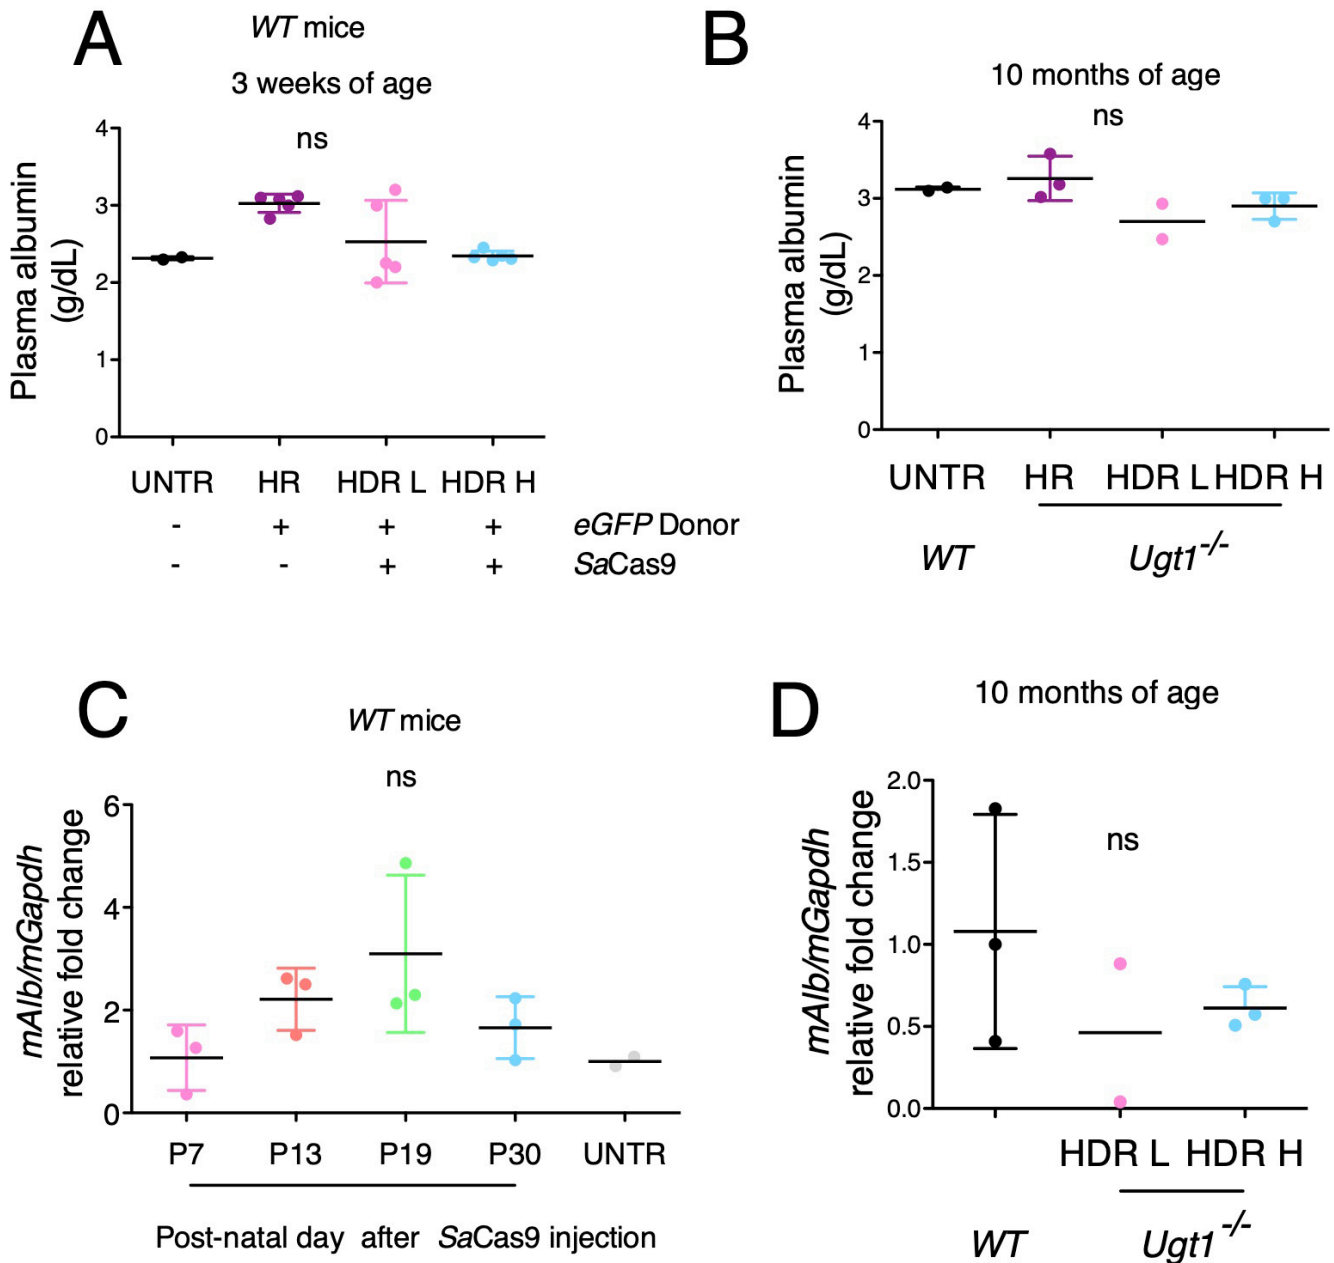

**Figure S11. Normal mRNA and protein levels of albumin after SaCas9 administration.** (A) Plasma albumin evaluation of WT mice untreated and treated at P2 with *eGFP*-donor DNA (HR), or with *eGFP*-donor DNA and *SaCas9* encoding AAV8 vectors, at low (HDR L) or high *SaCas9* dose (HDR H).  $n = 5$  per experimental group. The analysis was performed in the same animals used in Figure 3. One-way ANOVA, ns.,  $n = 5$  per experimental group. (B) Plasma albumin evaluation of WT mice untreated and treated at P2 with a constant dose of *hUGT1A1*-donor DNA AAV, and two doses of *SaCas9* encoding AAV8 vector (low, HDR L; or high, HDR H). The analysis was performed in the same animals used in Figure 4. One-way ANOVA, ns.,  $P = 0.1435$ , WT and HDR H,  $n = 3$ ; HDR L,  $n = 2$ . (C) Albumin mRNA levels of WT mice untreated (UNTR) and treated with only rAAV8-*SaCas9*-sgRNA8 ( $2.0E+11$  vg/mouse) at P2. Mice were sacrificed at different post-natal days, (P7, P13, P19, and P30) and the livers analyzed. One-way ANOVA, ns.,  $P = 0.5473$ , untreated mice,  $n = 2$ ; treated mice,  $n = 3$  per group. (D) Albumin mRNA levels of WT mice untreated (UNTR) and *Ugt1*<sup>-/-</sup> rAAV8-treated mice with a low (HDR L) and a higher ratio (HDR H) between *hUGT1A1*-donor and *SaCas9* at 10 months of age. The analysis was performed in the same animals used in Figure 4. One-way ANOVA, ns.,  $P = 0.4394$ ; WT and HDR H,  $n = 3$ ; HDR L,  $n = 2$ .

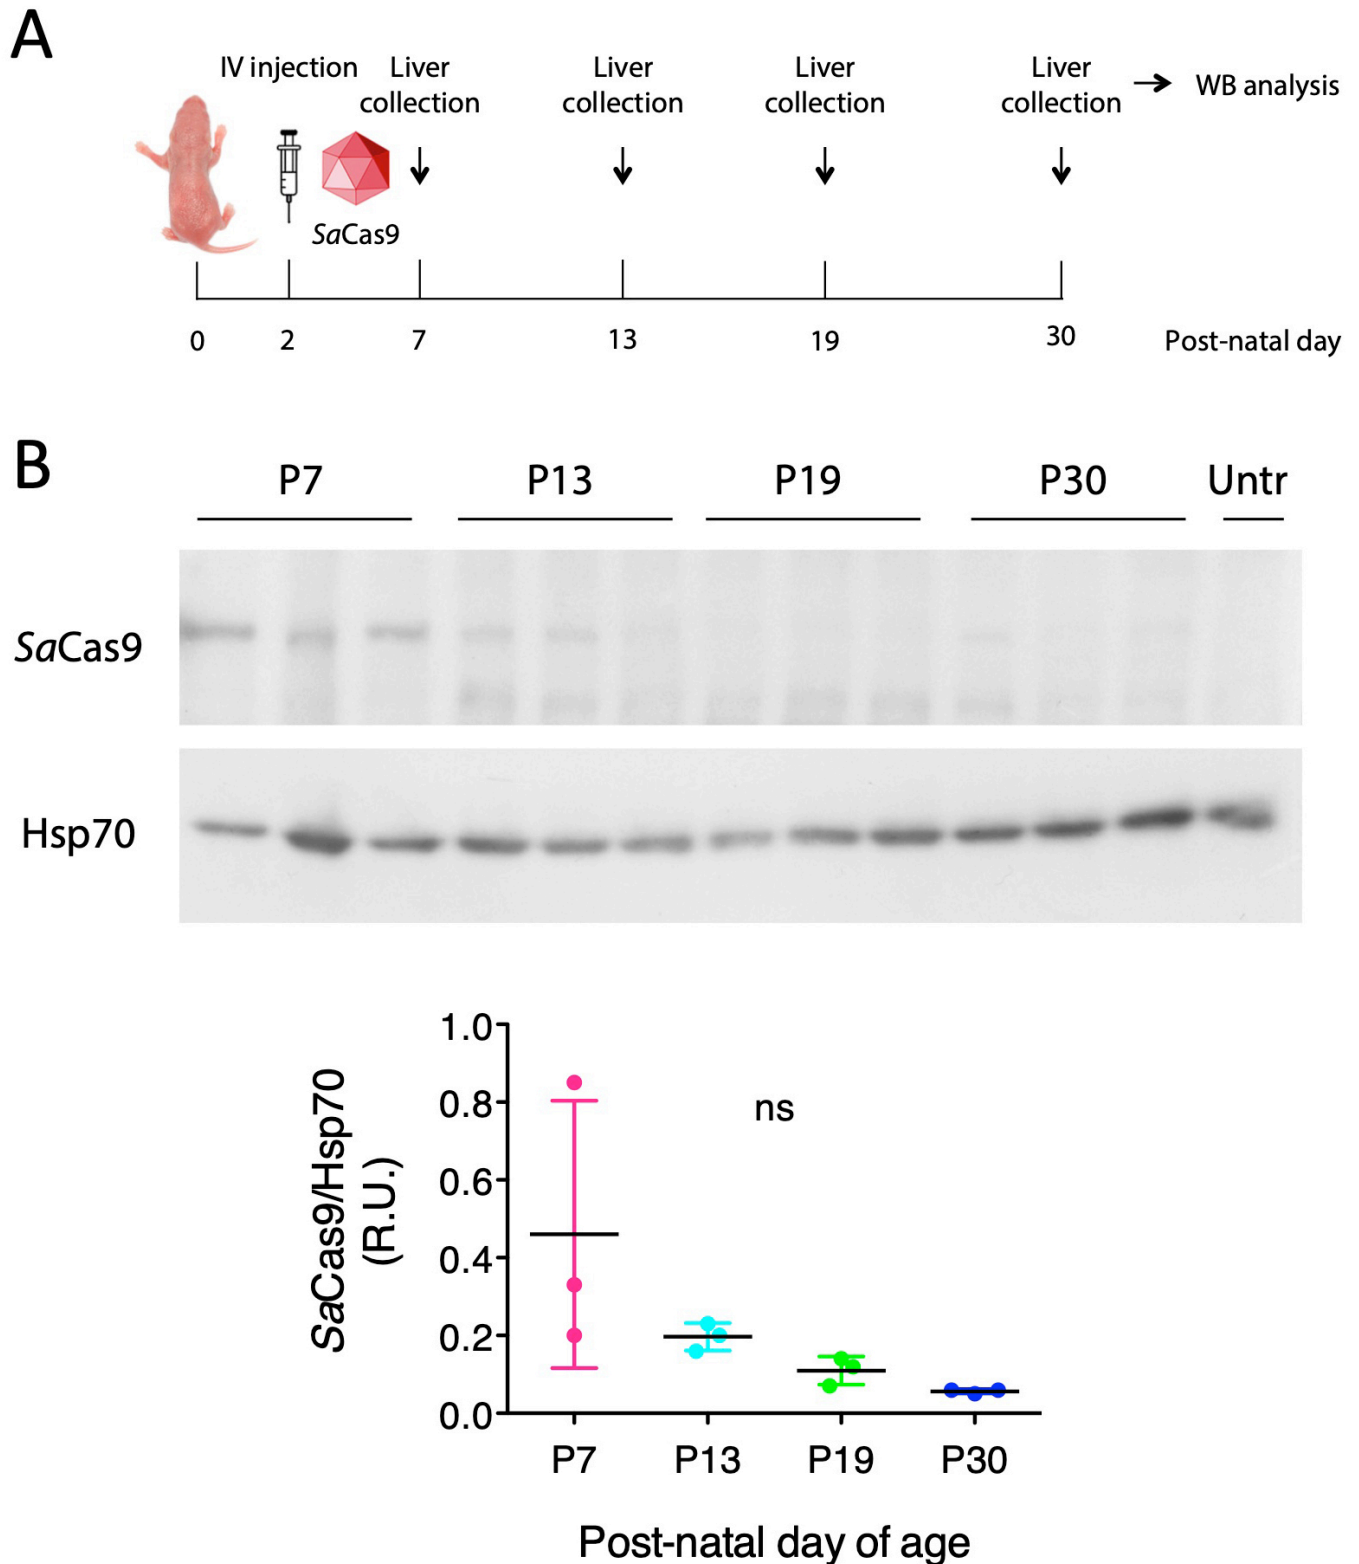

**Figure S12 *SaCas9* protein levels decrease to undetectable levels 30 days after its administration.** (A) Experimental scheme. WT newborn mice were intravenously transduced with rAAV8-*SaCas9*-sgRNA8 (2.0E+11 vg/mouse) at post-natal day 2. Livers were collected at post-natal days 7, 13, 19 and 30, and analyzed by WB. IV, intravenous; *SaCas9*, rAAV8-*SaCas9*-sgRNA8. (B) WB analysis of liver protein extracts of WT untreated and treated with rAAV8-*SaCas9*-sgRNA8 collected at different post-natal days. HSP70 was used as loading control. The quantification of the WB is shown in the lower panel. One-way ANOVA, ns,  $P = 0.0847$ ,  $n = 3$  per group.

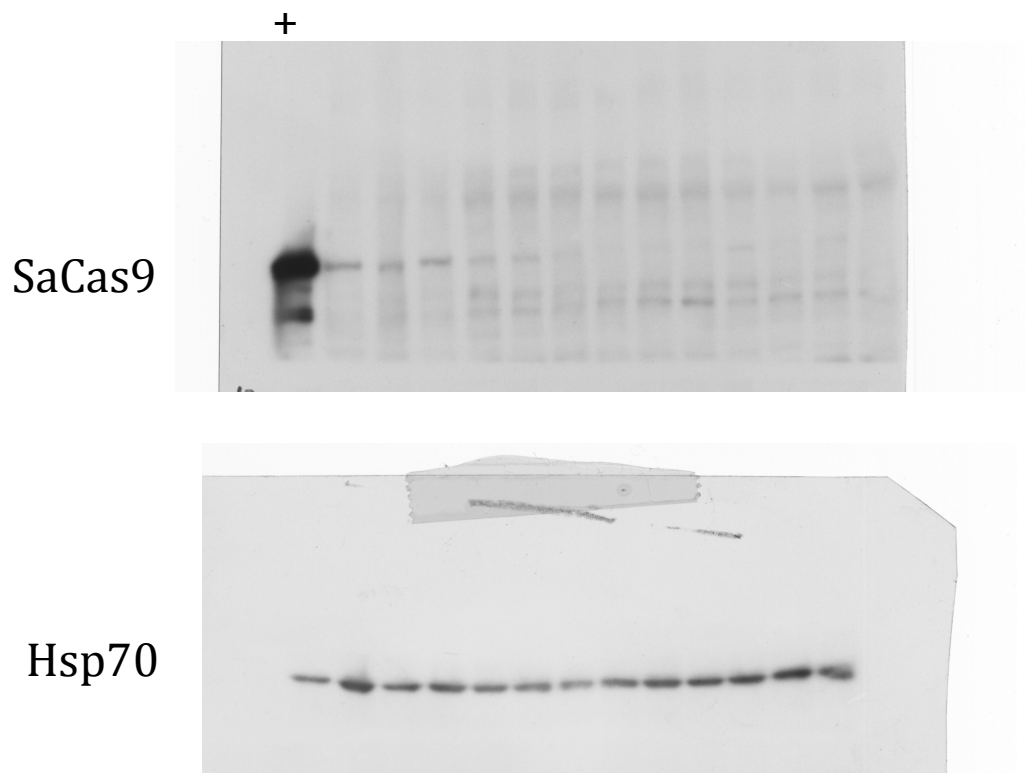

**Figure S13. Full uncut gels of Figure S12.** The “+” symbol in the first lane on the left indicates the positive control corresponding to tissue culture cells transfected with a plasmid expressing the SaCas9.

**A**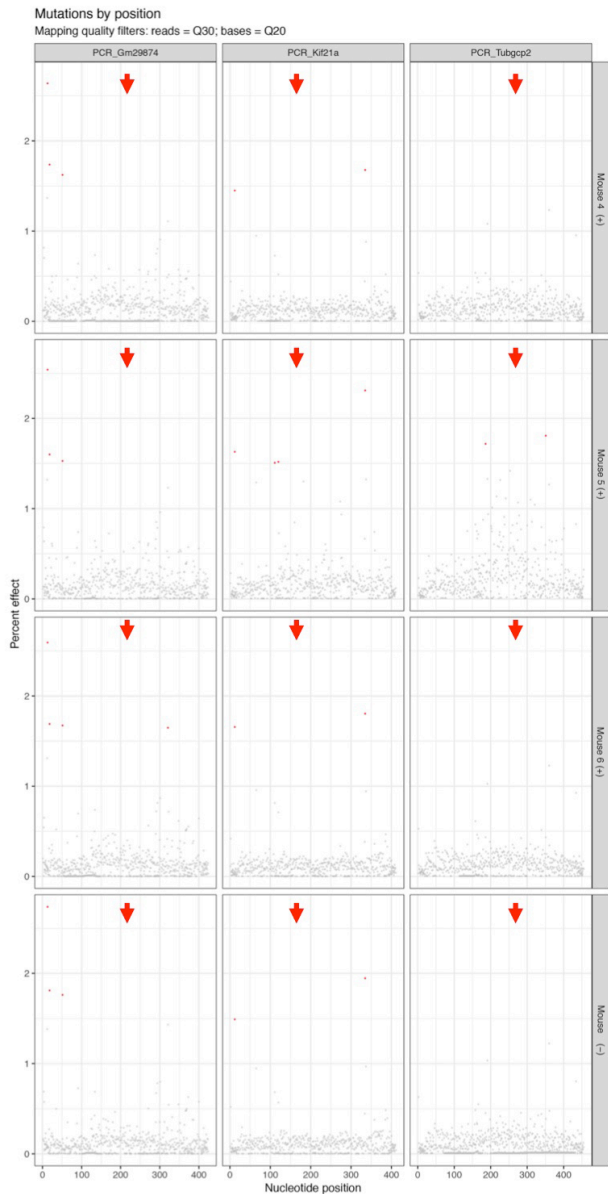**B**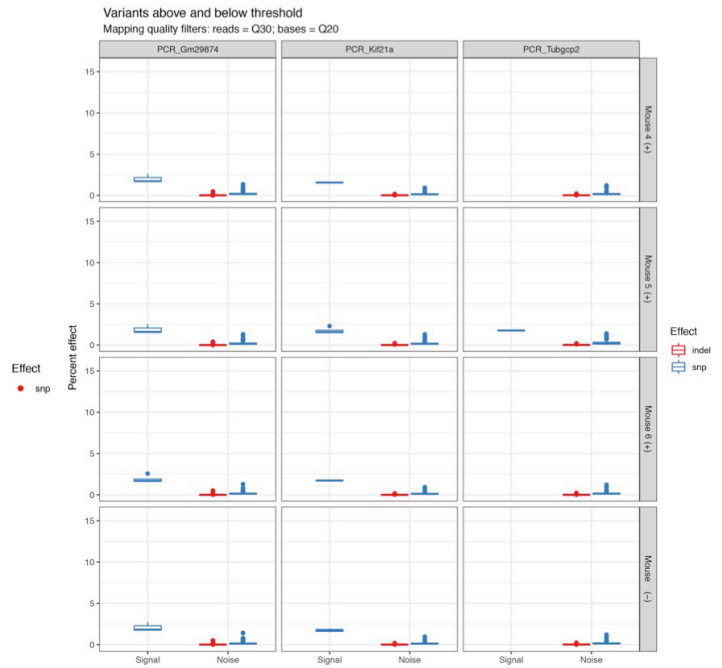

**Figure S14 Analysis of SaCas9 off-target activity.** (A). Mutation frequency analysis of the predicted potential off-target sites by *sgRNA8*. The dots represent the percentage of reads with bases different from the original sequence at each base position. The red and blue dots indicate variants above noise levels. Grey dots indicate variants below threshold levels (noise). The location of the predicted SaCas9 off-target site is indicated by a red arrow. (B) Box plots of the distributions of the data shown in Panel A, with indicated median values. Signal and noise distributions are plotted separately. Indels are represented in red and snp in blue. The analysis was performed in the same animals used in Figure 2C, D and Figure S3. The length of the PCR fragments was *Tubgcp2*, 522 bp; *Kif21a*, 478 bp; and *Gm29874*, 491 bp.

|                        |          |          |          |          |
|------------------------|----------|----------|----------|----------|
| <b>pEGFP C2</b>        | <b>+</b> | <b>+</b> | <b>+</b> | <b>+</b> |
| <b>pX601 + sgRNA7</b>  | <b>+</b> | <b>+</b> | <b>-</b> | <b>-</b> |
| <b>pX601 + sgRNA8</b>  | <b>-</b> | <b>-</b> | <b>+</b> | <b>+</b> |
| <b>T7 Endonuclease</b> | <b>+</b> | <b>-</b> | <b>+</b> | <b>-</b> |

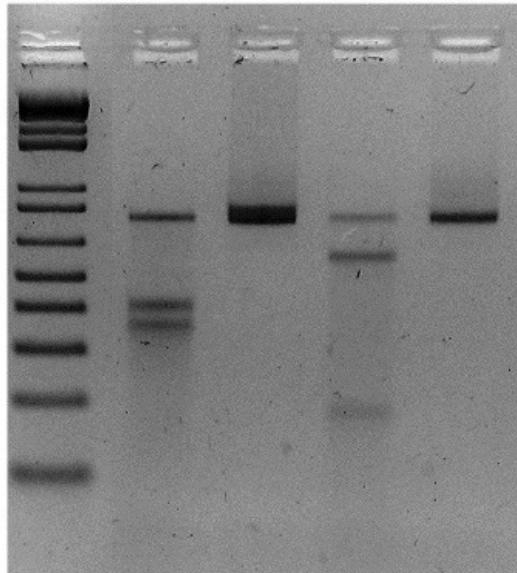

**Figure S15. Full uncut gels of Figure 2B.**

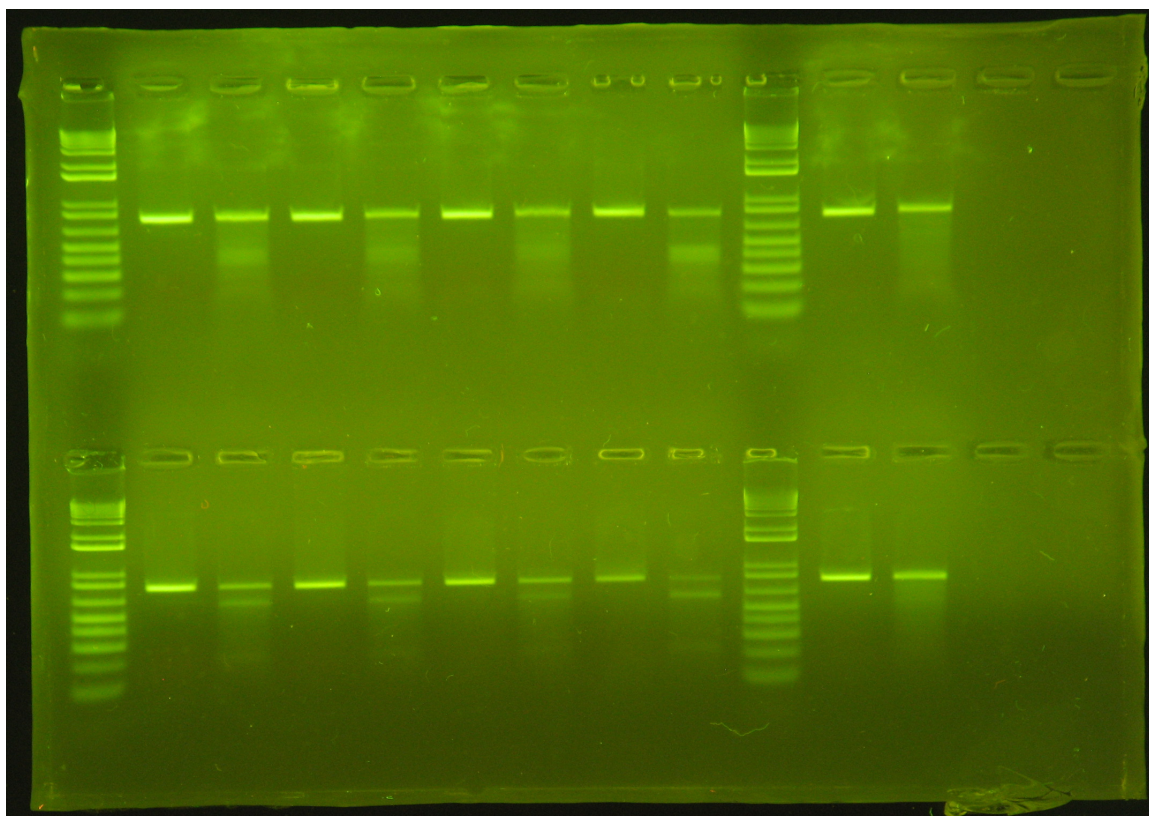

**Figure S16. Full uncut gels of Figure 2D.**

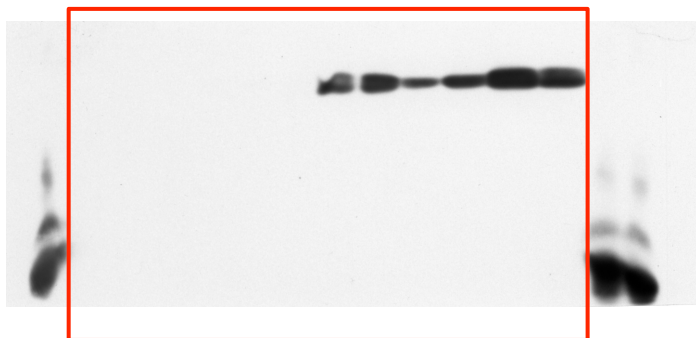

eGFP-Short exposition

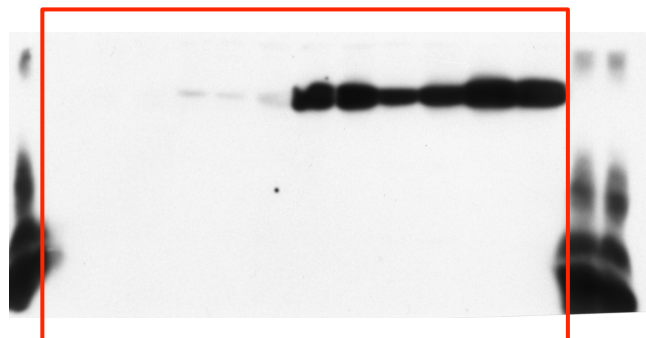

eGFP-Long exposition

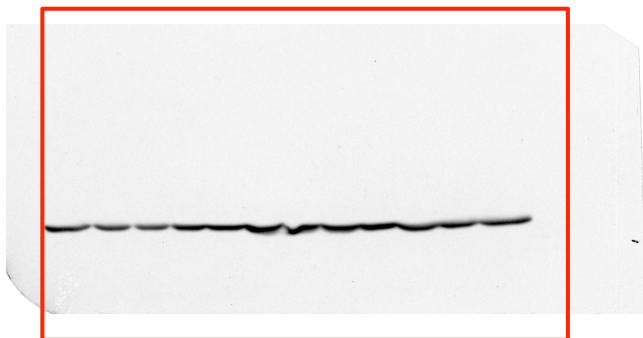

Actin

**Figure S17. Full uncut gels of Figure 3C.**

**Table S1. Gap-length frequency analysis of the albumin on-target site (*sgRNA8*)****Table S1**Gap-length frequency analysis at the *albumin* on-target site (*sgRNA8*)

|   | Sample ID   | Target sequence | N. of Reads | N. of gapped reads ( $\geq 2$ ) | N. of gapped reads ( $\geq 1$ ) | Percentage of reads with gaps $\geq 2$ | Percentage of reads with gaps $\geq 1$ | Maximum gap length | Mean gap length $\geq 2$ | Mean gap length $\geq 1$ | Median gap length $\geq 2$ | Median gap length $\geq 1$ |
|---|-------------|-----------------|-------------|---------------------------------|---------------------------------|----------------------------------------|----------------------------------------|--------------------|--------------------------|--------------------------|----------------------------|----------------------------|
| 1 | Mouse 4 (+) | <i>Albumin</i>  | 54986       | 10463                           | 12543                           | 19.0                                   | 22.81                                  | 306                | 18.7                     | 15.7                     | 7                          | 4                          |
| 2 | Mouse 5 (+) | <i>Albumin</i>  | 16967       | 3115                            | 3804                            | 18.4                                   | 22.42                                  | 239                | 10.4                     | 8.7                      | 5                          | 4                          |
| 3 | Mouse 6 (+) | <i>Albumin</i>  | 19176       | 2712                            | 3419                            | 14.1                                   | 17.83                                  | 237                | 12.0                     | 9.8                      | 6                          | 4                          |
| 4 | Mouse (-)   | <i>Albumin</i>  | 40676       | 78                              | 809                             | 0.2                                    | 1.99                                   | 69                 | 9.6                      | 1.8                      | 4                          | 1                          |
| 5 | Mouse 4 (+) | <i>Albumin</i>  | 137469      | 27215                           | 32476                           | 19.8                                   | 23.62                                  | 395                | 13.7                     | 11.7                     | 7                          | 4                          |
| 6 | Mouse (-)   | <i>Albumin</i>  | 41468       | 111                             | 900                             | 0.3                                    | 2.17                                   | 97                 | 20.6                     | 3.4                      | 5                          | 1                          |

The genomic DNA of the albumin on-target site was PCR amplified and sequenced by NGS approach. The obtained reads were aligned and noise filtered. The % of reads containing gaps  $\geq 2$  bases was determined. Lines 5 and 6 show the data of independent duplicate PCR reactions of Lines 1 and 4. The animals are the ones presented in Figure 2C-D for *sgRNA8*. The length of the PCR fragment was 517 bp.

**Table S2. Positional-frequency analysis of the albumin on-target site (*sgRNA8*)**

## Table S2

### Positional-frequency analysis at the *albumin* on-target site (*sgRNA8*)

| Sample ID   | Variant | Filter | Min | Max  | Mean | Median |
|-------------|---------|--------|-----|------|------|--------|
| Mouse 4 (+) | indel   | Signal | 1.4 | 15.1 | 4.7  | 3.1    |
| Mouse 4 (+) | indel   | Noise  | 0.0 | 1.4  | 0.7  | 0.7    |
| Mouse 4 (+) | snp     | Signal | ND  | ND   | ND   | ND     |
| Mouse 4 (+) | snp     | Noise  | 0.0 | 1.4  | 0.2  | 0.2    |
| Mouse 5 (+) | indel   | Signal | 1.7 | 14.7 | 5.4  | 3.9    |
| Mouse 5 (+) | indel   | Noise  | 0.0 | 1.6  | 0.2  | 0.2    |
| Mouse 5 (+) | snp     | Signal | ND  | ND   | ND   | ND     |
| Mouse 5 (+) | snp     | Noise  | 0.0 | 1.5  | 0.3  | 0.2    |
| Mouse 6 (+) | indel   | Signal | 1.6 | 11.1 | 4.7  | 4.5    |
| Mouse 6 (+) | indel   | Noise  | 0.0 | 1.5  | 0.2  | 0.2    |
| Mouse 6 (+) | snp     | Signal | ND  | ND   | ND   | ND     |
| Mouse 6 (+) | snp     | Noise  | 0.0 | 1.4  | 0.2  | 0.1    |
| Mouse (-)   | indel   | Noise  | 0.0 | 0.4  | 0.0  | 0.0    |
| Mouse (-)   | snp     | Signal | ND  | ND   | ND   | ND     |
| Mouse (-)   | snp     | Noise  | 0.0 | 1.5  | 0.1  | 0.1    |

The genomic DNA of the albumin on-target site was PCR amplified and sequenced by NGS. The positional-frequency analysis of the obtained reads was performed as described in the Materials and Methods section. The animals are the ones presented in Figure 2C, D for *sgRNA8*. The median values were plotted in Figure S3C. ND, not detected.

**Table S3. Positional-frequency analysis of predicted off-target sites**

## Table S3

### Positional-frequency analysis of predicted off-target sites

|             |         |        | <i>Kif21a</i> |       |       |              | <i>Tubgcp2</i> |       |       |              |
|-------------|---------|--------|---------------|-------|-------|--------------|----------------|-------|-------|--------------|
| Sample ID   | Variant | Filter | Min           | Max   | Mean  | Median       | Min            | Max   | Mean  | Median       |
| Mouse 4 (+) | indel   | Signal | ND            | ND    | ND    | <b>ND</b>    | ND             | ND    | ND    | <b>ND</b>    |
| Mouse 4 (+) | indel   | Noise  | 0.001         | 0.168 | 0.019 | <b>0.006</b> | 0.003          | 0.244 | 0.024 | <b>0.006</b> |
| Mouse 4 (+) | snp     | Signal | 1.450         | 1.678 | 1.564 | <b>1.564</b> | ND             | ND    | ND    | <b>ND</b>    |
| Mouse 4 (+) | snp     | Noise  | 0.014         | 0.948 | 0.149 | <b>0.133</b> | 0.011          | 1.234 | 0.177 | <b>0.157</b> |
| Mouse 5 (+) | indel   | Signal | ND            | ND    | ND    | <b>ND</b>    | ND             | ND    | ND    | <b>ND</b>    |
| Mouse 5 (+) | indel   | Noise  | 0.002         | 0.246 | 0.026 | <b>0.010</b> | 0.006          | 0.234 | 0.042 | <b>0.022</b> |
| Mouse 5 (+) | snp     | Signal | 1.508         | 2.309 | 1.741 | <b>1.574</b> | 1.718          | 1.808 | 1.763 | <b>1.763</b> |
| Mouse 5 (+) | snp     | Noise  | 0.014         | 1.324 | 0.194 | <b>0.164</b> | 0.009          | 1.419 | 0.274 | <b>0.199</b> |
| Mouse 6 (+) | indel   | Signal | ND            | ND    | ND    | <b>ND</b>    | ND             | ND    | ND    | <b>ND</b>    |
| Mouse 6 (+) | indel   | Noise  | 0.001         | 0.179 | 0.018 | <b>0.005</b> | 0.002          | 0.224 | 0.021 | <b>0.006</b> |
| Mouse 6 (+) | snp     | Signal | 1.657         | 1.804 | 1.730 | <b>1.730</b> | ND             | ND    | ND    | <b>ND</b>    |
| Mouse 6 (+) | snp     | Noise  | 0.015         | 0.957 | 0.136 | <b>0.122</b> | 0.017          | 1.228 | 0.163 | <b>0.148</b> |
| Mouse (-)   | indel   | Noise  | 0.001         | 0.199 | 0.017 | <b>0.004</b> | 0.004          | 0.221 | 0.017 | <b>0.013</b> |
| Mouse (-)   | snp     | Signal | 1.489         | 1.945 | 1.717 | <b>1.717</b> | ND             | ND    | ND    | <b>ND</b>    |
| Mouse (-)   | snp     | Noise  | 0.016         | 0.968 | 0.131 | <b>0.116</b> | 0.006          | 1.224 | 0.156 | <b>0.135</b> |

  

|             |        |        | <i>Gm29874</i> |       |       |              |
|-------------|--------|--------|----------------|-------|-------|--------------|
| sample_id   | sindel | pass   | Min            | Max   | Mean  | Median       |
| Mouse 4 (+) | indel  | Noise  | 0.001          | 0.477 | 0.019 | <b>0.003</b> |
| Mouse 4 (+) | snp    | Signal | 1.624          | 2.637 | 2.000 | <b>1.737</b> |
| Mouse 4 (+) | snp    | Noise  | 0.023          | 1.368 | 0.208 | <b>0.173</b> |
| Mouse 5 (+) | indel  | Noise  | 0.001          | 0.408 | 0.030 | <b>0.005</b> |
| Mouse 5 (+) | snp    | Signal | 1.528          | 2.540 | 1.889 | <b>1.600</b> |
| Mouse 5 (+) | snp    | Noise  | 0.012          | 1.319 | 0.205 | <b>0.153</b> |
| Mouse 6 (+) | indel  | Noise  | 0.001          | 0.528 | 0.027 | <b>0.004</b> |
| Mouse 6 (+) | snp    | Signal | 1.648          | 2.592 | 1.900 | <b>1.681</b> |
| Mouse 6 (+) | snp    | Noise  | 0.012          | 1.311 | 0.174 | <b>0.141</b> |
| Mouse (-)   | indel  | Noise  | 0.001          | 0.499 | 0.027 | <b>0.005</b> |
| Mouse (-)   | snp    | Signal | 1.761          | 2.739 | 2.103 | <b>1.810</b> |
| Mouse (-)   | snp    | Noise  | 0.016          | 1.431 | 0.155 | <b>0.120</b> |

The genomic DNA of the predicted potential off-target sites was PCR amplified and sequenced by NGS. The positional-frequency analysis of the obtained reads was performed as described in the Mat&Meth section. The animals are the ones presented in Figure 2C-D for *sgRNA8*. The median values were plotted in Figure S12B. ND, not detected.

**Table S4. Gap-length frequency analysis of predicted off-target sites**

**Table S4**

**Gap-length frequency analysis of predicted off-target sites**

|    | Sample ID   | Target sequence | N. of Reads | N. of gapped reads ( $\geq 2$ ) | N. of gapped reads ( $\geq 1$ ) | Percentage of reads with gaps $\geq 2$ | Percentage of reads with gaps $\geq 1$ | Maximum gap length | Mean gap length $\geq 2$ | Mean gap length $\geq 1$ | Median gap length $\geq 2$ | Median gap length $\geq 1$ |
|----|-------------|-----------------|-------------|---------------------------------|---------------------------------|----------------------------------------|----------------------------------------|--------------------|--------------------------|--------------------------|----------------------------|----------------------------|
| 1  | Mouse 4 (+) | <i>Kif21a</i>   | 69776       | 146                             | 1070                            | <b>0.2</b>                             | <b>1.5</b>                             | 367                | 105.0                    | 15.2                     | <b>2</b>                   | <b>1</b>                   |
| 2  | Mouse 4 (+) | <i>Tubgcp2</i>  | 37900       | 99                              | 728                             | <b>0.3</b>                             | <b>1.9</b>                             | 414                | 56.3                     | 8.5                      | <b>3</b>                   | <b>1</b>                   |
| 3  | Mouse 5 (+) | <i>Kif21a</i>   | 43506       | 78                              | 696                             | <b>0.2</b>                             | <b>1.6</b>                             | 368                | 82.1                     | 10.1                     | <b>2</b>                   | <b>1</b>                   |
| 4  | Mouse 5 (+) | <i>Tubgcp2</i>  | 22151       | 74                              | 480                             | <b>0.3</b>                             | <b>2.2</b>                             | 164                | 17.1                     | 3.5                      | <b>5</b>                   | <b>1</b>                   |
| 5  | Mouse 6 (+) | <i>Kif21a</i>   | 79425       | 88                              | 1143                            | <b>0.1</b>                             | <b>1.4</b>                             | 366                | 70.5                     | 6.3                      | <b>2</b>                   | <b>1</b>                   |
| 6  | Mouse 6 (+) | <i>Tubgcp2</i>  | 48061       | 84                              | 830                             | <b>0.2</b>                             | <b>1.7</b>                             | 59                 | 8.7                      | 1.8                      | <b>3</b>                   | <b>1</b>                   |
| 7  | Mouse (-)   | <i>Kif21a</i>   | 110129      | 192                             | 1610                            | <b>0.2</b>                             | <b>1.5</b>                             | 370                | 76.3                     | 10.0                     | <b>2</b>                   | <b>1</b>                   |
| 8  | Mouse (-)   | <i>Tubgcp2</i>  | 32617       | 67                              | 580                             | <b>0.2</b>                             | <b>1.8</b>                             | 230                | 14.1                     | 2.5                      | <b>3</b>                   | <b>1</b>                   |
| 9  | Mouse 4 (+) | <i>Gm29874</i>  | 135024      | 1136                            | 3671                            | <b>0.8</b>                             | <b>2.7</b>                             | 385                | 201.9                    | 63.2                     | <b>378</b>                 | <b>1</b>                   |
| 10 | Mouse 5 (+) | <i>Gm29874</i>  | 86507       | 410                             | 1976                            | <b>0.5</b>                             | <b>2.3</b>                             | 385                | 88.1                     | 19.1                     | <b>4</b>                   | <b>1</b>                   |
| 11 | Mouse 6 (+) | <i>Gm29874</i>  | 109815      | 840                             | 2814                            | <b>0.8</b>                             | <b>2.6</b>                             | 386                | 168.3                    | 50.9                     | <b>21</b>                  | <b>1</b>                   |
| 12 | Mouse (-)   | <i>Gm29874</i>  | 171007      | 1186                            | 4229                            | <b>0.7</b>                             | <b>2.5</b>                             | 385                | 161.0                    | 45.9                     | <b>4</b>                   | <b>1</b>                   |

The genomic DNA of the predicted potential off-target sites was PCR amplified and sequenced by NGS. The obtained reads were aligned and noise filtered. The % of reads containing gaps  $\geq 2$  bases was determined. The animals are the ones presented in Figure 2C-D for *sgRNA8*. The length of the PCR fragments was *Tubgcp2*, 522 bp; *Kif21a*, 478 bp; and *Gm29874*, 491 bp.

Table S5. Description of animal treatments

Table S5

Description of animal treatments

| Day of delivery (Post-natal day) | Mice                                    | Route of administration | rAAV8 vectors                               | Dose (vg/mouse) | Objective                                                                   | Figure        |
|----------------------------------|-----------------------------------------|-------------------------|---------------------------------------------|-----------------|-----------------------------------------------------------------------------|---------------|
| P4                               | WT                                      | IP                      | rAAV8-SaCas9-sgRNA8 and rAAV8-SaCas9-sgRNA7 | 1.0E+12         | SaCas9-sgRNA8 efficiency                                                    | Fig. 2C, D    |
| P4                               | WT                                      | IV                      | rAAV8-donor-eGFP                            | 8.0E+11         | HDR efficiency (low SaCas9 dose)                                            | Fig. 3        |
|                                  |                                         |                         | rAAV8-SaCas9-sgRNA8                         | 2.0E+11         |                                                                             |               |
|                                  |                                         |                         | rAAV8-donor-eGFP                            | 8.0E+11         | HDR efficiency (high SaCas9 dose)                                           |               |
|                                  |                                         |                         | rAAV8-SaCas9-sgRNA8                         | 6.0E+11         |                                                                             |               |
| P2                               | Ugt1 <sup>-/-</sup>                     | IV                      | rAAV-donor-hUGT1A1                          | 2.0E+11         | HDR efficiency (low SaCas9 dose)                                            | Fig. 4        |
|                                  |                                         |                         | rAAV8-SaCas9-sgRNA8                         | 6.0E+10         |                                                                             |               |
|                                  |                                         |                         | rAAV-donor-hUGT1A1                          | 2.0E+11         | HDR efficiency (high SaCas9 dose)                                           |               |
|                                  |                                         |                         | rAAV8-SaCas9-sgRNA8                         | 2.0E+11         |                                                                             |               |
| P4                               | WT (same mice of Fig. 2)                | IP                      | rAAV8-SaCas9-sgRNA8 and rAAV8-SaCas9-sgRNA7 | 1.0E+12         | SaCas9-sgRNA8 on-target efficiency                                          | Supp. Fig. 3  |
| P4                               | WT                                      | IP                      | rAAV8-SaCas9-sgRNA8                         | 2.5E+11         | SaCas9-sgRNA8 dose-finding experiment                                       | Supp. Fig. 4  |
|                                  |                                         |                         |                                             | 5.0E+11         |                                                                             |               |
|                                  |                                         |                         |                                             | 7.5E+11         |                                                                             |               |
|                                  |                                         |                         |                                             | 1.0E+12         |                                                                             |               |
| P4                               | WT                                      | IP                      | pGG2-AAT-eGFP                               | 1.0E+11         | IP vs. IV comparison                                                        | Supp. Fig. 5  |
|                                  |                                         | IV                      |                                             |                 |                                                                             |               |
| P2                               | WT                                      | IV                      | rAAV8-donor-eGFP                            | 8.0E+11         | P2 vs. P4 comparison                                                        | Supp. Fig. 6  |
| P4                               |                                         |                         |                                             |                 |                                                                             |               |
| P2                               | WT                                      | IV                      | rAAV8-SaCas9-sgRNA8                         | 2.0E+11         | Determination of albumin mRNA at different time points after viral delivery | Supp. Fig. 10 |
| P2                               | WT (same animals used in Supp. Fig. 10) | IV                      | rAAV8-SaCas9-sgRNA8                         | 2.0E+11         | Determination of SaCas9 at different time points after viral delivery       | Supp. Fig. 11 |

Table S6. List of oligonucleotides coding for the sgRNAs

Table S6

List of oligonucleotides coding for the sgRNAs

| Primer      | 5'-3' sequence             | sgRNA encoded |
|-------------|----------------------------|---------------|
| sgRNA5_up   | CACCGCATCCATCATTTCCTTGTTTT | sgRNA5        |
| sgRNA5_down | AAACAAAACAAAGAAATGATGGATGC |               |
| sgRNA6_up   | CACCGACCCTGAAAACAAAGAAATG  | sgRNA6        |
| sgRNA6_down | AAACCATTTCCTTGTTTTTCAGGGTC |               |
| sgRNA7_up   | CACCGAAAAGTATTAGCAGGACTGT  | sgRNA7        |
| sgRNA7_down | AAACACAGTCCTGCTAATACTTTTC  |               |
| sgRNA8_up   | CACCGATGACCATACGTGAAGACCT  | sgRNA8        |
| sgRNA8_down | AAACAGGTCTTCACGTATGGTCATC  |               |
| sgRNA9_up   | CACCGAGATGTCAGAGAGCCTGCTTT | sgRNA9        |
| sgRNA9_down | AAACAAAGCAGGCTCTCTGACATCTC |               |

**Table S7. Primers used to amplify the albumin target region**

**Table S7**

Primers used to amplify the *albumin* target region

| Primer      | 5'-3' sequence             | Application                | bp  |
|-------------|----------------------------|----------------------------|-----|
| FwStopmALB  | GCCACACTGCTGCCTATTAAATACC  | genomic PCR for T7E1 assay | 787 |
| RevStopmALB | CTTACATGAACCACTATGTGGAGTCC |                            |     |

**Table S8. List of oligonucleotides used for qRT-PCR**

## Table S8

### List of oligonucleotides used for qRT-PCR

| <b>Primer</b>        | <b>5'-3' sequence</b>   |
|----------------------|-------------------------|
| <b>GFP For</b>       | TGCCCGACAACCACTACCTG    |
| <b>Alb11R</b>        | TGAGTCCTGAGTCTTCATGTCTT |
| <b>Alb10F</b>        | CTGACAAGGACACCTGCTTC    |
| <b>Alb11R</b>        | TGAGTCCTGAGTCTTCATGTCTT |
| <b>mTNFa_DIR</b>     | TTCGAGTGACAAGCCTGTAG    |
| <b>mTNFa_REV</b>     | AGACAAGGTACAACCCATCG    |
| <b>mCD8aDIR</b>      | TCAGTTCTGTCGTGCCAGTC    |
| <b>mCD8_ex2_rev</b>  | GCACTGGCTTGGTAGTAGTA    |
| <b>mCD4DIR</b>       | GCAGCATGGCAAAGGTGTAT    |
| <b>mCD4REV</b>       | AAACGATCAAACCTGCGAAGG   |
| <b>mIFNg For</b>     | CACGGCACAGTCATTGAAAG    |
| <b>mIFNg Rev</b>     | TTGCTGATGGCCTGATTGTC    |
| <b>mALB For</b>      | GCATGAAGTTGCCAGAAGAC    |
| <b>mALB Rev</b>      | TCTGCATACTGGAGCACTTC    |
| <b>RT-mGAPDH dir</b> | ATGGTGAAGGTCGGTGTGAA    |
| <b>RT-mGAPDH rev</b> | GTTGATGGCAACAATCTCCA    |

**Table S9. List of antibodies**

**Table S9**

**Antibodies**

| <b>Protein name</b> | <b>Supplier</b>  | <b>#code</b> | <b>Source</b>     | <b>Application</b> | <b>Dilution</b> |
|---------------------|------------------|--------------|-------------------|--------------------|-----------------|
| eGFP                | Santa Cruz       | sc-8334      | rabbit polyclonal | WB                 | 1:1000          |
| Actin               | Sigma-Aldrich    | A-2066       | rabbit polyclonal | WB                 | 1:2000          |
| hUgt1a1             | Santa Cruz       | H-300        | rabbit polyclonal | WB                 | 1:600           |
| SaCas9              | abcam            | EPR19795     | rabbit monoclonal | WB                 | 1:5000          |
| Hsp70               | Sigma-Aldrich    | H-5147       | rat polyclonal    | WB                 | 1:8000          |
| hUgt1a1             | Sigma-Aldrich    | SAB2701158   | rabbit polyclonal | IF                 | 1:200           |
| Calbindin           | Synaptic Systems | 214002       | rabbit polyclonal | IF                 | 1:400           |

Table S10. List of oligonucleotides used for NGS sequencing of on- and off-targets

Table S10

Oligonucleotides used for Illumina sequencing of on- and off-targets

| Primer            | 5'-3' sequence                                               |
|-------------------|--------------------------------------------------------------|
| Gm29874_for2_tail | TCGTCGGCAGCGTCAGATGTGTATAAGAGACAGATCTTATGGACTGAGCCACC        |
| Gm29874_rev2_tail | GTCTCGTGGGCTCGGAGATGTGTATAAGAGACAGTAGAGGTGGACTTCAGCATG       |
| Kif21a_FOR1_tail  | TCGTCGGCAGCGTCAGATGTGTATAAGAGACAGCAAGGACCTTTAGCCTCTGA        |
| Kif21a_REV2_tail  | GTCTCGTGGGCTCGGAGATGTGTATAAGAGACAGTGTACGGCTACCAAGGATAC       |
| Tubgcp2_FOR2_tail | TCGTCGGCAGCGTCAGATGTGTATAAGAGACAGAAGGCAGAGACCTTCAGTTG        |
| Tubgcp2_REV2_tail | GTCTCGTGGGCTCGGAGATGTGTATAAGAGACAGTGGAGAAACACTTGAGGCAG       |
| pAB1403dir_tail   | TCGTCGGCAGCGTCAGATGTGTATAAGAGACAGGCCTATGGCTATGAAGTGCAAATCCTA |
| Revstop_malb_tail | GTCTCGTGGGCTCGGAGATGTGTATAAGAGACAGGGACTCCACATAGTGGTTCATGTAAG |

In red are present the tails for Illumina seq as requested by BMR Genomics
